# Supplementary material
Source: PubMed Central journal article supplement (PMC6237215)
Supplement: jciinsight-3-96902-s254.pdf [file jciinsight-3-96902-s254.pdf]

- 1** Preface
- 2**
- 3** Modifications are shown in red.

**4 Leukotriene B<sub>4</sub> promotes neovascularization and macrophage recruitment in**  
**5 murine wet-type AMD models**

6

7 Fumiyuki Sasaki<sup>1</sup>, Tomoaki Koga<sup>1,2</sup>, Mai Ohba<sup>1</sup>, Kazuko Saeki<sup>1</sup>, Toshiaki Okuno<sup>1</sup>,  
8 Keijiro Ishikawa<sup>3</sup>, Takahito Nakama<sup>3</sup>, Shintaro Nakao<sup>3</sup>, Shigeo Yoshida<sup>3</sup>, Tatsuro  
9 Ishibashi<sup>3</sup>, Hamid Ahmadieh<sup>4</sup>, Mozghan Rezaei Kanavi<sup>5</sup>, Ali Hafezi-Moghadam<sup>6</sup>, Josef  
10 M. Penninger<sup>7</sup>, Koh-Hei Sonoda<sup>3</sup> and Takehiko Yokomizo<sup>1,\*</sup>

11

12 <sup>1</sup>Department of Biochemistry, Juntendo University School of Medicine, Tokyo, Japan.

13 <sup>2</sup>Current Address: Department of Medical Cell Biology, Institute of Molecular  
14 Embryology and Genetics, Kumamoto University, Kumamoto, Japan.

15 <sup>3</sup>Department of Ophthalmology, Graduate School of Medical Sciences, Kyushu  
16 University, Fukuoka, Japan.

17 <sup>4</sup>Ophthalmic Research Center, Shahid Beheshti University of Medical Sciences, Tehran,  
18 Iran.

19 <sup>5</sup>Ocular Tissue Engineering Research Center, Shahid Beheshti University of Medical  
20 Sciences, Tehran, Iran.

21 <sup>6</sup>Molecular Biomarkers Nano-Imaging Laboratory, Brigham & Women's Hospital, and  
22 Department of Radiology, Harvard Medical School, Boston, MA, USA.

23 <sup>7</sup>Institute of Molecular Biotechnology of the Austrian Academy of Sciences (IMBA),  
24 Vienna, Austria.

25

26

27 \*Correspondence to Takehiko Yokomizo

- 28 Department of Biochemistry, Juntendo University School of Medicine.  
29 Hongo 2-1-1, Bunkyo-ku, Tokyo 113-8421, Japan.  
30 Telephone: +81-3-5802-1030 (office), 1031 (laboratory)  
31 Fax: +81-3-5802-5889  
32 E-mail: yokomizo-tky@umin.ac.jp  
33 ORCID: 0000-0002-5219-1553  
34 **COI: The authors have declared that no conflict of interest exists except for the U.S.**  
35 **patent application No 15/525,660 (Fumiya Sasaki and Takehiko Yokomizo).**  
36  
37 **Running title:** LTB<sub>4</sub>-BLT1 axis exacerbates laser-induced CNV  
38 **Abbreviations:**  
39 5-LO, 5-lipoxygenase  
40 AMD, age-related macular degeneration  
41 BLT1, leukotriene B<sub>4</sub> receptor 1  
42 BLT2, leukotriene B<sub>4</sub> receptor 2  
43 CNV, choroidal neovascularization  
44 FLAP, 5-lipoxygenase-activating protein  
45 IVI, intravitreal injection  
46 LTA<sub>4</sub>H, leukotriene A<sub>4</sub> hydrolase  
47 LTB<sub>4</sub>, leukotriene B<sub>4</sub>  
48 RPE, retinal pigment epithelium

**49 ABSTRACT**

**50** Age-related macular degeneration (AMD), a progressive chronic disease of the central  
**51** retina, is associated with aging and is a leading cause of blindness worldwide. Here, we  
**52** demonstrate that leukotriene B<sub>4</sub> (LTB<sub>4</sub>) receptor 1 (BLT1) promotes laser-induced  
**53** choroidal neovascularization (CNV) in a mouse model for wet-type AMD. CNV was  
**54** significantly less in BLT1-deficient (BLT1-KO) mice compared to BLT1-WT controls.  
**55** Expression of several pro-angiogenic and pro-fibrotic factors was lower in BLT1-KO  
**56** eyes than in BLT1-WT eyes. LTB<sub>4</sub> production in the eyes was substantially increased in  
**57** the early phase after laser injury. BLT1 was highly expressed in M2 macrophages *in vitro*  
**58** and *in vivo*, and ocular BLT1<sup>+</sup> M2 macrophages were increased in the aged eyes post-  
**59** laser injury. Furthermore, M2 macrophages were rapidly attracted by LTB<sub>4</sub> and  
**60** subsequently produced VEGF-A through BLT1-mediated signaling. Consequently,  
**61** intravitreal injection of M2 macrophages augmented CNV formation, which was  
**62** attenuated by BLT1 deficiency. Thus, laser-induced injury to the retina triggered LTB<sub>4</sub>  
**63** production and attracted M2 macrophages via BLT1, leading to development of CNV. A  
**64** selective BLT1 antagonist (CP105696) and three LTB<sub>4</sub> inhibitors (Zileuton, MK-886, and  
**65** Bestatin) reduced CNV in a dose-dependent manner. CP105696 also inhibited the  
**66** accumulation of BLT1<sup>+</sup> M2 macrophages in the laser-injured eyes of aged mice. Together,  
**67** these results indicate that the LTB<sub>4</sub>-BLT1 axis is a novel therapeutic target for CNV of  
**68** wet-type AMD.

**69**

**70** Brief summary

**71** Leukotriene B<sub>4</sub> attracts M2 macrophages and exacerbates laser-induced choroidal  
**72** neovascularization. Leukotriene B<sub>4</sub> receptor 1 will be a novel target in the wet-type of

**73** age-related macular degeneration.

## 74 INTRODUCTION

75 Age-related macular degeneration (AMD) is a chronic disease of the eye that is a leading  
76 cause of irreversible blindness in people over 50 years-of-age. AMD, which affects nearly  
77 40 million individuals worldwide (1), is caused by deterioration of the retina, including  
78 the macula, which contains neuronal cells, photoreceptors, and retinal pigment epithelium  
79 (RPE) cells. AMD is classified as either wet (also called neovascular or exudative) type  
80 or dry (also called geographic atrophy) type. Wet AMD is characterized by degeneration  
81 of the macula, accompanied by fluid leakage from choroidal neovessels that have invaded  
82 the retina. The lesion is infiltrated by immune cells such as macrophages, DC, microglial  
83 cells, and T cells (e.g., NKT and  $\gamma\delta$ T cells) (2-4). The main treatments for wet AMD are  
84 agents that inhibit VEGF; however, such agents frequently require repeated intravitreal  
85 injection (IVI), which can cause infectious endophthalmitis, intraocular inflammation,  
86 and ocular hemorrhage (5).

87 Leukotriene B<sub>4</sub> (LTB<sub>4</sub>) receptor 1 (BLT1) is a G protein-coupled receptor (6) for a  
88 chemotactic eicosanoid, LTB<sub>4</sub> (7, 8), which is generated from arachidonic acid by 5-  
89 lipoxygenase (5-LO), 5-lipoxygenase-activating protein (FLAP), and LTA<sub>4</sub> hydrolase  
90 (LTA<sub>4</sub>H) (9) (Supplemental Figure 1). BLT1 is expressed by various leukocyte subsets,  
91 including granulocytes (neutrophils and eosinophils), monocytes, macrophages, DC,  
92 differentiated T cells (Th1, Th2, Th17, and effector CD8<sup>+</sup> T cells), mast cells, and  
93 osteoclasts (10). As shown by previous reports, the LTB<sub>4</sub>-BLT1 axis regulates  
94 inflammatory and immunological responses such as peritonitis (11), bronchial asthma  
95 (12, 13), delayed-type hypersensitivity (14), arthritis (15), atherosclerosis (16, 17),  
96 multiple sclerosis (18), psoriasis (19), and obesity-associated insulin resistance (20).

97 Activated macrophages are roughly classified as “classically activated” (M1-type) or

98 “alternatively activated” (M2-type) (21). M1 macrophages are induced by pathogen-  
99 associated molecular patterns (e.g., LPS) and inflammatory cytokines (e.g., IFN- $\gamma$ ) and  
100 defend against invading microbial pathogens such as bacteria, protozoa, and viruses.  
101 Several proteins are used as markers to distinguish M1 and M2 macrophages. Inducible  
102 NOS (iNOS) is a representative M1 marker (22-25), and co-stimulatory molecules (CD80  
103 and CD86) and MHC class II are also useful markers for M1 polarization (26-30). M2  
104 macrophages are regulated by Th2 cytokines (e.g., IL-4 and IL-13), anti-inflammatory  
105 cytokines (e.g., IL-10 and TGF- $\beta$ ), immune complexes, glucocorticoids and other factors  
106 (31) and are involved in diverse chronic inflammatory diseases such as parasite infections  
107 (32), allergies (33), obesity (34, 35), and the pro-angiogenic responses that occur in cancer  
108 (36) and tissue remodeling and repair (37-39). Mannose receptor (MR, CD206),  
109 macrophage galactose N-acetyl-galactosamine specific lectin, (Mgl, CD301), programmed  
110 cell death 1 ligand 2 (PD-L2, CD273), and PD-L1 (CD274) are well-characterized as the  
111 cell surface markers (40-44), and Arginase-1, Fizz1, and Ym1 are known as distinct  
112 markers (45-48) for M2 polarization. Recently, we and others reported that M2  
113 macrophages recruited to the injured retina make a critical contribution to the  
114 pathogenesis of choroidal neovascularization (CNV) in wet AMD (49-53); however, the  
115 molecular mechanisms underlying recruitment of M2 macrophages are poorly  
116 understood. Here, we show that BLT1 is mainly expressed by M2 macrophages, which  
117 are then recruited to laser-induced retinal lesions and produced VEGF-A in a BLT1-  
118 dependent manner. We also show that LTB<sub>4</sub>-BLT1 signaling exacerbates CNV in a mouse  
119 model of wet AMD by increasing expression of pro-angiogenic and pro-fibrotic markers.  
120 Importantly, we confirm that blockade of LTB<sub>4</sub>-BLT1 signaling strongly inhibits CNV.

## 121 RESULTS

### 122 BLT1 deficiency ameliorates progression of CNV in a mouse model of AMD

123 Recent reports showed that LTB<sub>4</sub>-BLT1 signaling promotes several chronic diseases  
124 including fibrosis (54), insulin resistance (55), tumorigenesis (56); however, its role in  
125 chronic eye diseases has been poorly understood. To examine the pathological role of  
126 BLT1 in the eye *in vivo*, we performed retinal laser photocoagulation to induce wet AMD  
127 (57) in BLT1-WT and BLT1-deficient (BLT1-KO) mice (13) of various ages. BLT1-WT  
128 mice showed an age-dependent increase in CNV volume (Figure 1A, upper panels).  
129 Surprisingly, aging did not affect CNV development in BLT1-KO mice, and the volume  
130 of CNV was much smaller in old BLT1-KO mice than in old BLT1-WT mice (Figure 1A,  
131 lower panels). The CNV volume in BLT1-WT mice increased in an age-dependent  
132 manner (average volume in young mice,  $3.1 \times 10^5 \mu\text{m}^3$ ; middle-aged mice,  $5.4 \times 10^5 \mu\text{m}^3$ ;  
133 and old mice,  $7.2 \times 10^5 \mu\text{m}^3$ ); this was not the case in BLT1-KO mice on Day 7 post-  
134 injury (young mice,  $2.6 \times 10^5 \mu\text{m}^3$ ; middle-aged mice,  $2.3 \times 10^5 \mu\text{m}^3$ ; and old mice,  $3.2$   
135  $\times 10^5 \mu\text{m}^3$ ) (Figure 1B). We also observed that the size of the laser-induced lesion in old  
136 BLT1-KO mice was smaller than that in old BLT1-WT mice (Figure 1C, lower panels);  
137 however, the overall retinal structure was the same in both groups (Figure 1C, upper  
138 panels). We also confirmed that BLT1-KO mice had smaller lesion areas than those of  
139 BLT1-WT mice in aged eyes (average area in BLT1-WT mice,  $3.0 \times 10^4 \mu\text{m}^2$ ; BLT1-KO  
140 mice,  $1.3 \times 10^4 \mu\text{m}^2$ ) (Figure 1D). In wet AMD, pathological angiogenesis is critically  
141 involved in CNV development and accelerates subretinal fibrosis by increasing various  
142 cytokines and chemokines (2, 58, 59). Consistently, expression of mRNA encoding pro-  
143 angiogenic growth factors *Vegfa*, *Pdgfb*, and *Fgf2* in laser-injured BLT1-KO eyes was  
144 approximately half as much as in BLT1-WT eyes on Day 7 post-laser injury in old mice



145 (Figure 2A, upper panels). The amounts of mRNA encoding inflammatory cytokines (*Il1b*  
146 and *Tnf*), endothelial cell markers (*Tek*, also known as *Tie2*, and *Vwf*), and the pro-fibrotic  
147 factors *Tgfb1*, *Pdgfb*, and *Fgf2* (59) were lower in laser-treated BLT1-KO eyes. However,  
148 expression of mRNA encoding the chemokines *Ccl3* (Figure 2A, middle and lower  
149 panels) and *Ccl2* (data not shown), both of which were reported to play a role in AMD  
150 pathogenesis (60, 61), was not significantly different between the BLT1-KO and BLT-  
151 WT groups. We previously cloned a low-affinity LTB<sub>4</sub> receptor, BLT2 (62, 63), which is  
152 involved in colitis (64), epidermal wound healing (65), and acute lung injury (66), and  
153 examined the effect of BLT2 deficiency in the same AMD model (Supplemental Figure  
154 2). We found that BLT2 was not involved in AMD because the CNV volume in BLT2-  
155 deficient (BLT2-KO) mice was comparable with that in their WT (BLT2-WT) littermates  
156 (BLT2-WT mice,  $4.4 \times 10^5 \mu\text{m}^3$ ; BLT2-KO mice,  $3.4 \times 10^5 \mu\text{m}^3$ ) (Supplemental Figure  
157 2B). Next, we performed the simultaneous quantification of 52 eicosanoids in laser-  
158 injured mouse eyes using a LC-MS/MS (Figure 2 and Supplemental Figure 3). On Day 1  
159 and Day 3 post-laser injury, the amount of LTB<sub>4</sub> (Figure 2B) and 5-  
160 hydroxyeicosatetraenoic acid (5-HETE) (Supplemental Figure 3A) in the eyes markedly  
161 increased both in young and old mice. These results are consistent with the previous  
162 studies showing that various leukotrienes including LTB<sub>4</sub> were produced from the retinal  
163 glial cells, retinal endothelial cells, and RPE in the pathogenesis of inflammatory eye  
164 diseases at early phase (67, 68). Taken together, these results suggest that LTB<sub>4</sub>-BLT1  
165 signaling is critical for progression of laser-induced CNV.

166

### 167 **BLT1 is expressed by macrophages and is involved in CNV development**

168 As BLT1 is highly expressed in various subsets of leukocytes, we speculated that BLT1

169 expressed in retinal leukocytes is responsible for CNV. Previous studies showed that  
170 retinal leukocytes were reconstituted with donor leukocytes by bone marrow (BM)  
171 transplantation (69-73). To examine whether BLT1-expressing leukocytes play a role in  
172 laser-induced CNV, we implanted BLT1-WT or BLT1-KO BM cells from aging donors  
173 into lethally irradiated WT mice from aging recipients to generate BM chimeric mice and  
174 then examined CNV volume (Figure 3, A and B). We confirmed that more than 90% of  
175 BM cells and peripheral blood leukocytes (PBL) of the CD45.2-positive (CD45.2<sup>+</sup>)  
176 recipients (C57BL/6J-Ly5.2 mice) were donor-derived CD45.1<sup>+</sup> cells from a congenic  
177 strain (C57BL/6-Ly5.1 mice) (Supplemental Figure 4, A and B). These results showed  
178 that the efficiency of BM transplantation is independent of the age of donors or recipients  
179 (Supplemental Figure 4C). The volume of CNV in BLT1-KO chimeras was significantly  
180 smaller than that in BLT1-WT chimeras (BLT1-WT BM into WT,  $10.3 \times 10^5 \mu\text{m}^3$ ; BLT1-  
181 KO BM into WT,  $6.8 \times 10^5 \mu\text{m}^3$ ) (Figure 3B). We further analyzed the numbers and the  
182 percentages of leukocyte populations in the eyes by FACS analysis (Figure 3, C and D).  
183 CD45<sup>+</sup> total leukocytes and CD11b-high (CD11b<sup>hi</sup>) F4/80-negative (F4/80<sup>-</sup>) Ly6G<sup>hi</sup>  
184 neutrophils peaked at day 1, but CD11b<sup>hi</sup> F4/80<sup>-</sup> Ly6C<sup>hi</sup> inflammatory monocytes and  
185 CD11b<sup>hi</sup> F4/80<sup>hi</sup> macrophages peaked at day 3 after laser injury in the eyes of aged WT  
186 mice. Consistent with the previous studies, we found that BLT1 is abundantly expressed  
187 in CD11b<sup>hi</sup> F4/80<sup>-</sup> Ly6G<sup>hi</sup> neutrophils and CD11b<sup>hi</sup> F4/80<sup>hi</sup> macrophages in the laser-  
188 injured eyes (data not shown). We further observed that BLT1<sup>+</sup> macrophages infiltrated  
189 the periphery of the laser-injured area in the RPE-choroid in aged mice on Day 5 post-  
190 laser injury (Figure 3E, upper panels), but not in young mice (Figure 3E, lower panels).  
191 To determine whether BLT1<sup>+</sup> macrophages contribute to the development of CNV, we  
192 next depleted macrophages by IVI of clodronate liposomes (Figure 4 and Supplemental

193 Figure 5) as previously described (74). IVI of clodronate liposomes significantly reduced  
194 F4/80<sup>+</sup> macrophages in the RPE-choroid compared to control liposomes (Supplemental  
195 Figure 5C), but did not affect the number of DAPI<sup>+</sup> cells (Supplemental Figure 5D).  
196 Macrophage depletion reduced CNV volume in BLT1-WT mice (control,  $13.5 \times 10^5 \mu\text{m}^3$ ;  
197 clodronate,  $2.6 \times 10^5 \mu\text{m}^3$ ) to levels observed in BLT1-KO mice (control,  $2.5 \times 10^5 \mu\text{m}^3$ ;  
198 clodronate,  $1.1 \times 10^5 \mu\text{m}^3$ ) (Figure 4B). Taken together, these results suggest that BLT1<sup>+</sup>  
199 macrophages exacerbate laser-induced CNV.

200

### 201 **BLT1 is expressed in M2 macrophages *in vitro* and *in vivo***

202 Recent studies have been shown that macrophages are skewed toward pro-angiogenic  
203 phenotype in the injured tissue or the tumor microenvironment (36, 39, 44, 48, 53, 75).  
204 Next, we examined BLT1 expression in M1 and M2 macrophages using BM-derived  
205 macrophages (BMDMs) (Figure 5, A and B and Supplemental Figure 6A), RAW264.7  
206 cells (mouse monocyte/macrophage cell line) (Figure 5C), and THP-1 cells (human  
207 monocytic cell line) (Figure 5D). M2 polarization of BMDMs induced BLT1 mRNA  
208 (Gene Symbol: *Ltb4r1*) (Figure 5A and Supplemental Figure 6A, M2) and protein (Figure  
209 5B, M2) expression, while M1 polarization or non-polarized M0 BMDMs showed lower  
210 levels of BLT1 expression (Figure 5, A and B and Supplemental Figure 6A, M0 and M1).  
211 Polarization of BMDMs was confirmed by examining the expression levels of mRNA for  
212 M2 specific markers including CD206 (*Mrc1*), CD301b (*Mgl2*), PD-L2 (*Pdcd1lg2*),  
213 Arginase-1 (*Arg1*), Fizz1 (*Retnla*), and Ym1 (*Chil3*) (Supplemental Figure 6, B-G), or an  
214 M1 specific marker, iNOS (*Nos2*) (Supplemental Figure 6H). Consistent with these  
215 results, M2-polarization induced BLT1 expression in both RAW264.7 and THP-1 cells,  
216 and M1- or M0-polarization did not (Figure 5, C and D, left panels). Expression of PD-

217 L2 and CD80 proteins also confirmed the proper M2 and M1 polarization, respectively  
218 (Figure 5, C and D, middle and right panels). In addition, we analyzed the number and  
219 percentage of M2 macrophages by FACS analysis (Figure 5, E-H). The absolute number  
220 of CD206<sup>+</sup> M2 macrophages peaked at day 3 after laser-injury (Figure 5E), but the  
221 percentage of CD206<sup>+</sup> M2 macrophages in CD45<sup>+</sup> total leukocytes (Figure 5F) or in  
222 CD11b<sup>hi</sup> F4/80<sup>hi</sup> total macrophages (Figure 5G) peaked at day 5 in the eyes of aged WT  
223 mice. The percentage of BLT1<sup>+</sup> CD206<sup>+</sup> M2 macrophages was significantly higher during  
224 Day 1 to Day 5 after laser injury in aged mice (Figure 5H). We also found that ocular-  
225 infiltrating BLT1<sup>+</sup> macrophages expressed high levels of several M2 markers (CD206,  
226 CD301, and PD-L2) on Day 5 post-laser injury (Figure 5I). Interestingly, the expression  
227 levels of the M2 markers on BLT1<sup>+</sup> macrophages were slightly higher than those on  
228 BLT1<sup>-</sup> macrophages (Figure 5I, lower panels). To note, we found that BLT1 expression  
229 (Figure 5, J and K) in aged mice were higher than those in young mice in the ocular-  
230 infiltrating CD206<sup>+</sup> M2 macrophages on Day 3 post-laser injury. These results suggest  
231 that the infiltration of ocular M2 macrophages is accelerated by age-dependent up-  
232 regulation of BLT1.

233

### 234 **LTB<sub>4</sub>-BLT1 axis up-regulates recruitment of M2 macrophages and subsequent** 235 **VEGF-A production**

236 Although some molecules and signaling pathway have been implicated in the activation  
237 of M2 macrophages, the cellular and molecular mechanism is not fully elucidated. In  
238 general, BLT1 mediates LTB<sub>4</sub>-induced calcium mobilization, chemotaxis, and inhibition  
239 of adenylyl cyclase through the activation of Gq and Gi proteins (76). To determine whether  
240 M2 macrophages express functional BLT1 *in vitro*, we performed calcium mobilization

241 (Figure 6A) and chemotaxis (Figure 6, B-D and Supplemental movie 1 and 2) assays.  
242 M2-, but not M1- or M0-polarized RAW264.7 cells exhibited increased intracellular  
243 calcium mobilization upon LTB<sub>4</sub> stimulation (Figure 6A) and migrated along an  
244 increasing LTB<sub>4</sub> concentration gradient (Figure 6B and Supplemental movies 1 and 2).  
245 The M2-RAW264.7 cells significantly responded to LTB<sub>4</sub> with a velocity and  
246 directionality of 3.29 unit s<sup>-1</sup> and 0.88, respectively (Figure 6, C and D). We next analyzed  
247 the expression levels of VEGF-A mRNA (Figure 7A) and protein (Figure 7B) in M2  
248 BMDMs from BLT1-WT and BLT1-KO mice. Stimulation of LTB<sub>4</sub> significantly induced  
249 VEGF-A mRNA and protein expression in M2 BMDMs from BLT1-WT, but not in  
250 BLT1-KO M2 BMDMs. Thus, LTB<sub>4</sub>-BLT1 signal is important for activation of M2  
251 macrophages.

252

### 253 **M2 macrophages promote BLT1-mediated development of CNV**

254 Recent findings have experimentally confirmed that adoptive transferred M2  
255 macrophages develop CNV by stimulating an abnormal angiogenesis (52, 77-79). To  
256 clarify whether BLT1<sup>+</sup> M2 macrophages exacerbate CNV, we adoptively transferred M0,  
257 M1, and M2 macrophages from BLT1-WT or BLT1-KO mice into laser-injured WT mice  
258 (Figure 8). Adoptive transfer of BLT1-WT M2-BMDMs resulted in marked CNV  
259 formation when compared with transfer of BLT1-KO M2-BMDMs (BLT1-WT M2 into  
260 WT,  $10.5 \times 10^5 \mu\text{m}^3$ ; BLT1-KO M2 into WT,  $4.4 \times 10^5 \mu\text{m}^3$ ); adoptive transfer of M0-  
261 and M1-BMDMs has little effect on CNV formation (BLT1-WT M0,  $2.9 \times 10^5 \mu\text{m}^3$ ;  
262 BLT1-KO M0,  $2.1 \times 10^5 \mu\text{m}^3$ ; BLT1-WT M1,  $2.7 \times 10^5 \mu\text{m}^3$ ; BLT1-KO M1,  $1.6 \times 10^5$   
263  $\mu\text{m}^3$ ) (Figure 8, A and B). Histological analysis revealed that BLT1-WT M2-injected eyes  
264 developed more robust neovascularization in retinal and choroidal tissues than BLT1-KO

265 M2-injected eyes (BLT1-WT M2 into WT,  $2.8 \times 10^4 \mu\text{m}^2$ ; BLT1-KO M2 into WT,  $1.0 \times$   
266  $10^4 \mu\text{m}^2$ ) (Figure 8, C and D). Thus, expression of BLT1 is required for M2-induced CNV.

267

### 268 **Pharmacological inhibition of LTB<sub>4</sub>-BLT1 signaling ameliorates CNV development**

269 Several studies demonstrated that a BLT1 antagonist CP105696 completely blocked [<sup>3</sup>H]-  
270 labeled LTB<sub>4</sub> binding (IC<sub>50</sub> of 3.7 nM for human neutrophils) (80), calcium mobilization  
271 (0.1-1  $\mu\text{M}$  for human neutrophils) (81), phagocytosis (1  $\mu\text{M}$  for BMDMs) (82), and  
272 chemotaxis (0.1  $\mu\text{M}$  for mouse peritoneal macrophages) (20) by antagonizing BLT1. To  
273 investigate whether blockade of LTB<sub>4</sub>-BLT1 signaling (Supplemental Figure 1) (9, 83,  
274 84) attenuates CNV, we treated mice by IVI of CP105696, prior to laser-induced injury  
275 (Figure 9, A and C, upper panels). We also tested the effects of three inhibitors of LTB<sub>4</sub>-  
276 producing enzymes: Zileuton, a specific inhibitor of 5-LO; MK-886, a specific inhibitor  
277 of FLAP; and Bestatin, an inhibitor of LTA<sub>4</sub>H (Figure 9A, lower panels, and Figure 9C,  
278 middle and lower panels). CP105696 caused a dose-dependent reduction in CNV volume  
279 (DMSO,  $6.6 \times 10^5 \mu\text{m}^3$ ; CP105696, 0.2 pmol:  $3.5 \times 10^5 \mu\text{m}^3$ ; 2 pmol:  $2.0 \times 10^5 \mu\text{m}^3$ ; 20  
280 pmol:  $1.0 \times 10^5 \mu\text{m}^3$ ) (Figure 9B) and in CNV lesion area (DMSO,  $3.5 \times 10^4 \mu\text{m}^2$ ;  
281 CP105696, 20 pmol:  $1.6 \times 10^4 \mu\text{m}^2$ ) (Figure 9D). The CNV development was also  
282 inhibited by treatment with Zileuton, MK-886, or Bestatin (CNV volume: Zileuton,  $2.8$   
283  $\times 10^5 \mu\text{m}^3$ ; MK-886,  $2.8 \times 10^5 \mu\text{m}^3$ ; Bestatin,  $1.9 \times 10^5 \mu\text{m}^3$ ) (CNV lesion area: Zileuton,  
284  $1.3 \times 10^4 \mu\text{m}^2$ ; MK-886,  $1.8 \times 10^4 \mu\text{m}^2$ ; Bestatin,  $1.4 \times 10^4 \mu\text{m}^2$ ) (Figure 9, B and D).  
285 Moreover, we confirmed that CP105696 suppressed the infiltration of CD206<sup>+</sup> M2  
286 macrophages and BLT1<sup>+</sup> CD206<sup>+</sup> M2 macrophages (Figure 9, E and F).  
287 Given that some of these drugs are orally available, the LTB<sub>4</sub>-BLT1 axis may become a  
288 novel therapeutic target for laser-induced CNV.

## 289 DISCUSSION

290 Here, we demonstrated that the volume of CNV in BLT1-WT mice, but not in BLT1-KO  
291 mice, increases in an age-dependent manner (Figure 1). A high-affinity LTB<sub>4</sub> receptor,  
292 BLT1, which was expressed in ocular-infiltrating macrophages (Figure 3E) was  
293 responsible for CNV (Figure 4 and 8). On the other hands, a low-affinity LTB<sub>4</sub> receptor,  
294 BLT2, which is ubiquitously expressed in human and mouse tissues (85) including cornea  
295 and conjunctiva (86) was not involved in laser injury-induced CNV, because there was  
296 no significant difference in CNV volume and histology between BLT2-WT and BLT2-  
297 KO mice (Supplemental Figure 2). As we reported recently, M2-type macrophages are  
298 important for the development of CNV after laser injury (53); here, we also demonstrated  
299 that ocular-infiltrating M2 macrophages contribute to CNV development via LTB<sub>4</sub>-BLT1  
300 signaling pathway. Indeed, laser-induced injury increased the amount of LTB<sub>4</sub> in the eyes  
301 (Figure 2B), which then attracted BLT1<sup>+</sup> M2 macrophages to the injured mouse retina  
302 (Figure 5, E-K). We also found that BLT1 is only induced during M2 polarization of  
303 mouse and human macrophages by IL-10, IL-4, IL-13, and TGF- $\beta$  (Figure 5, A-D).  
304 Preliminary experiments with a STAT3 selective inhibitor suggest that, of these, the IL-  
305 10/JAK1/STAT3 signaling pathway is likely critical for induction of BLT1 expression  
306 (Supplemental Figure 7). Recent studies show that expression of IL-10 and M2 markers  
307 (e.g., CD163 and Arginase-1), but not M1 markers (e.g., IL-6 and TNF- $\alpha$ ), is increased  
308 in senescent macrophages, thereby promoting CNV development (51, 52). Therefore, we  
309 expected that BLT1 expression is also increased in senescent M2 macrophages in the eyes  
310 of older mice. We actually found that the BLT1 expression of M2 macrophages in the  
311 older eyes is higher than that in the younger eyes after induction of laser injury (Figure 5,  
312 J and K). The elevated BLT1 could accelerate LTB<sub>4</sub>-dependent recruitment of M2

313 macrophages to CNV lesions leading to the production of various pro-angiogenic factors,  
314 including VEGF-A through the activation of BLT1 (Figure 7). Such chain of events would  
315 also promote human CNV in wet AMD.

316 The findings presented herein might contribute to the development of novel anti-AMD  
317 drugs (Figure 9). Although anti-VEGF agents (e.g., Ranibizumab and Bevacizumab) are  
318 clinically and commercially available for wet AMD (87), several clinical trials have  
319 examined new therapeutic agents that targeting components of the VEGF (e.g., VEGF  
320 receptor tyrosine kinases) or other (e.g., PDGF) signaling pathways (88). To date, the  
321 LTB<sub>4</sub>-BLT1 axis has not been examined in AMD. We speculate that agents that target the  
322 LTB<sub>4</sub>-BLT1 axis might become useful treatment options for human patients with severe  
323 wet AMD. In fact, we examined the BLT1 expression in the diabetic human donor eyes  
324 (early progressive diabetic retinopathy, age 55, female) compared with non-diabetic  
325 human donor eyes (car accident, age 13, male) (data not shown). We found that BLT1<sup>+</sup>  
326 cells infiltrated into the periphery of the macular drusen, a common early sign of AMD,  
327 and choroidal capillaries in the RPE-choroid of diabetic human eyes, but not in non-  
328 diabetic human eyes. Recent studies showed that infiltrated macrophages exhibit M2-  
329 phenotype, which accelerate neovascularization to promote tissue repair in the injured  
330 retina of retinopathy (38, 79, 89, 90). Hence, the BLT1 may be a promising therapeutic  
331 target for CNV of several diseases including wet AMD. The 5-LO inhibitor Zileuton is  
332 clinically used as an anti-asthmatic drug worldwide (83), and the LTA<sub>4</sub>H inhibitor  
333 Ubenimex (Bestatin) is a chemotherapy agent in Japan (84), with known safety profiles  
334 in both cases. This allows their potential off label use as therapeutic agents for wet AMD,  
335 thereby ensuring patient safety. In contrast, MK-886 and CP105696 are not used  
336 clinically; thus more effective and safe inhibitors of FLAP, and antagonists of BLT1, are



**337** required.

**338**

**339** In conclusion, LTB<sub>4</sub> is a key mediator that attracts M2 macrophages to the laser-injured

**340** retinas via BLT1, thereby increasing the severity of CNV. Antagonists of BLT1 or

**341** inhibitors of LTB<sub>4</sub> biosynthesis may become novel therapeutic agents to inhibit CNV of

**342** wet AMD.

**343 METHODS**

**344 Animals**

**345** BLT1-KO and BLT2-KO mice were generated as previously described (13, 64) and then  
**346** backcrossed with C57BL/6J mice for more than 12 generations. Aged WT mice  
**347** (C57BL/6J: > 20 weeks old) were purchased from Japan SLC (Shizuoka, Japan) or Kyudo  
**348** (Saga, Japan). All mice were maintained in a filtered-air laminar-flow enclosure in a  
**349** specific pathogen-free facility and given standard laboratory food and water.

**350**

**351 Reagents**

**352** The selective BLT1 antagonist, CP105696, was from Pfizer (New York, NY, USA).  
**353** Zileuton (a 5-LO inhibitor), MK-886 sodium salt hydrate (a FLAP inhibitor), and Bestatin  
**354** hydrochloride (an inhibitor of aminopeptidases, including LTA<sub>4</sub>H) were obtained from  
**355** Sigma-Aldrich (St. Louis, MO, USA). LTB<sub>4</sub> was purchased from Cayman Chemical (Ann  
**356** Arbor, MI, USA). Unless otherwise noted, all Abs and cytokines were purchased from  
**357** BioLegend (San Diego, CA, USA) and Peprotech (Rocky Hill, CT, USA), respectively.

**358**

**359 Laser-induced wet AMD model**

**360** Mice were anesthetized by intraperitoneal injection of ketamine (100 mg/kg) and xylazine  
**361** (10 mg/kg), and the pupils were dilated by application of 0.2% tropicamide and 1%  
**362** phenylephrine hydrochloride (Santen Pharmaceutical Co., Osaka, Japan). Using a 532 nm  
**363** laser, a slit-lamp delivery system, and a slide glass as a contact lens, four spots (laser  
**364** power, 200 mW; exposure time, 100 ms; hole size, 75 μm) were placed into each eye.  
**365** After laser-induced injury and prior to administration of antagonists/inhibitors, the eyes  
**366** were subjected to IVI of CP105696 (0.2–20 pmol), Zileuton (20 pmol), MK-886 (20

367 pmol), Bestatin (20 pmol), or DMSO (vehicle, 0.1%). The volume of the CNV lesions  
368 was measured in choroidal flat mounts on Day 7 post-injury. The anterior segment and  
369 retina were removed from the eyecup after fixation in 4% paraformaldehyde in PBS. The  
370 remaining RPE-choroid complex was dehydrated in methanol and stained with 7 µg/ml  
371 fluorescein-labeled iB4 (derived from Griffonia Simplicifolia Lectin I) (Vector  
372 Laboratories, Burlingame, CA, USA). After relaxing radial incisions, this complex was  
373 flat mounted using mounting medium (Thermo Fisher Scientific) and coverslips. Z-stack  
374 images were obtained using a confocal microscope (A1R<sup>+</sup>; Nikon, Tokyo, Japan) and the  
375 CNV volume was analyzed on reconstructed three-dimensional images using NIS-  
376 Elements (Nikon).

377

### 378 **Polarization of M1 and M2 macrophages**

379 BM cells in the femur and tibia were collected from BLT1-WT and BLT1-KO mice (> 20  
380 weeks old) and further differentiated in RPMI 1640 (Wako, Osaka, Japan) supplemented  
381 with 10% FCS, 100 U/ml penicillin, and 100 µg/ml streptomycin (P/S) into BMDMs by  
382 treatment with 50 ng/ml M-CSF for 3 days. RAW264.7 (a subclone from clone TIB-71)  
383 (ATCC, Manassas, VA, USA) and THP-1 (clone TIB-202) (ATCC) cell lines were  
384 maintained in RPMI 1640 supplemented with 10% FCS and P/S. BMDMs and  
385 RAW264.7 cells were polarized by exposure to 2 ng/ml mouse IFN-γ and 0.1 µg/ml LPS  
386 (Sigma-Aldrich) (M1) or 20 ng/ml IL-4, IL-10, and IL-13 (from mouse) and 2 ng/ml  
387 human TGF-β1 (R&D Systems, Minneapolis, MN, USA) (M2) during 48 h. THP-1 cells  
388 were stimulated with 150 nM PMA for 24 h and then polarized with 2 ng/ml human IFN-  
389 γ and 0.1 µg/ml LPS (M1) or 20 ng/ml IL-4, IL-10, and IL-13 (from human) and 2 ng/ml  
390 human TGF-β1 (M2) during 48 h. M0 macrophages were generated by culture in medium

391 without cytokines. All cells were cultured under standard conditions at 37°C and 5% CO<sub>2</sub>  
392 in a humidified atmosphere.

393

#### 394 **H&E staining**

395 Eyes were removed, soaked in 10% buffered formalin solution, embedded in paraffin,  
396 sliced (10 µm thickness) using a microtome, and stained with H&E. Images were acquired  
397 under a light microscope (BZ-9000; Keyence, Osaka, Japan) and quantified the CNV  
398 lesion area using Image J (National Institute of Health, Bethesda, MD).

399

#### 400 **Quantitative RT-PCR**

401 Eyecups (the remaining retina, choroid, and RPE from 1–2 eyes) and M0-, M1-, or M2-  
402 polarized BMDMs were prepared from BLT1-WT and BLT1-KO mice. For VEGF-A  
403 mRNA expression analysis, M2 BMDMs were stimulated with 500 nM LTB<sub>4</sub> or ethanol  
404 (as a vehicle control) for 0.5 h. All samples were treated with TRIzol reagent (Thermo  
405 Fisher Scientific, Waltham, MA, USA) to isolate RNA, according to the manufacturer's  
406 instructions. cDNA was synthesized from total RNA with reverse transcriptase and an  
407 optimized blend of oligo-dTs and random primers using an QuantiTect Reverse  
408 Transcription kit (Qiagen, Hilden, Germany) or qPCR RT Master Mix (Toyobo, Osaka,  
409 Japan). Target genes were amplified using a real-time PCR System (Roche, Basel,  
410 Switzerland or Thermo Fisher Scientific), DNA polymerase, SYBR Green I Dye (Thermo  
411 Fisher Scientific) and specific primers. Gene expression was normalized to 18S rRNA  
412 (*Rn18s*) using the  $\Delta\Delta$ CT method. The sequences of the primers are as follows: *Vegfa*:  
413 Forward, 5'-actggaccctggctttactg-3' and Reverse, 5'-tctgctctccttctgtctg-3'; *Rn18s*:  
414 Forward, 5'-gcaattattcccatgaacg-3' and Reverse, 5'-gggacttaatacaacgcaagc-3'; *Pdgfb*:

415 Forward, 5'-cggcctgtgactagaagtcc-3' and Reverse, 5'-gagcttgaggcgtcttgg-3'; *Fgf2*:  
416 Forward, 5'-cggctctactgcaagaacg-3' and Reverse, 5'-tgcttggagttgtagtttgacg-3'; *Il1b*:  
417 Forward, 5'-tgtaatgaaagacggcacacc-3' and Reverse, 5'-tcttctttgggtattgcttgg-3'; *Tnf*:  
418 Forward, 5'-tcttctcattctgcttgtgg-3' and Reverse, 5'-ggcttgggcatagaactga-3'; *Tek*:  
419 Forward, 5'-cataggaggaaacctgttcacc-3' and Reverse, 5'-gccccacttctgagctt-3'; *Vwf*:  
420 Forward, 5'-ccaaggagggtctgcaact-3' and Reverse, 5'-aaaggaagactctggcaagcta-3'; *Tgfb1*:  
421 Forward, 5'-tggagcaacatgtggaactc-3' and Reverse, 5'-cagcagccggttaccacg-3'; *Ccl3*:  
422 Forward, 5'-tgcccttgctgttcttct-3' and Reverse, 5'-gtggaatcttccggtctag-3'; and *Ltb4r1*:  
423 Forward, 5'-ctcggaggtgtccagcac-3' and Reverse, 5'-gacaggcaggtgtgccttc-3'.

424

#### 425 **Liquid chromatography-mass spectrometry (LC-MS) analysis**

426 Eyecups isolated from 5–6 eyes were frozen immediately in liquid nitrogen and stored at  
427 -80°C. Samples were homogenized in a tissue disrupter (Automill, Tokken, Chiba, Japan)  
428 and lipids were extracted by incubation in methanol overnight at -20°C followed by  
429 centrifuged at 5,000 × g for 5 min at 4°C. Supernatants were then mixed with 9 volumes  
430 of 0.1% formic acid in water, which included deuterium-labeled internal standards  
431 (Cayman Chemical). Diluted samples were loaded onto a solid-phase extraction cartridge  
432 (Waters, Milford, MA, USA) and washed serially with 0.1% formic acid in water, 15%  
433 methanol and 0.1% formic acid in water, 0.1% formic acid in water, and petroleum ether.  
434 After drying the cartridge, eicosanoids were eluted by centrifugation with 200 µl of 0.1%  
435 formic acid in methanol. For reverse phase-HPLC-MS/MS, a Shimadzu liquid  
436 chromatography system consisting of four LC-20AD pumps, a SIL-20AC autosampler, a  
437 CTO-20AC column oven, a FCV-12AH six-port switching valve, and a TSQ Quantum  
438 Ultra triple quadrupole mass spectrometer equipped with an electrospray ionization (ESI)

439 ion source (Thermo Fisher Scientific) were used (91, 92). An aliquot of each sample (50  
440  $\mu\text{L}$ ) was injected into the trap column, an Opti-Guard Mini C18, at a total flow rate of  
441 500  $\mu\text{L}/\text{min}$ . Three minutes after sample injection, the valve was switched to introduce  
442 the trapped sample to the analytical column, a Capcell Pak C18 MGS3 (Shiseido, Tokyo,  
443 Japan). Separation of lipids was achieved by a linear gradient using water and acetonitrile  
444 containing 0.1% formic acid. The total flow rate was 120  $\mu\text{L}/\text{min}$ , the column temperature  
445 was set at 46°C, and the LC column eluent was introduced directly into a TSQ Quantum  
446 Ultra. All compounds were analyzed in a negative ion polarity mode. Eicosanoids were  
447 quantified by multiple reaction monitoring (MRM). The MRM transitions monitored  
448 were  $m/z$  335  $\rightarrow$  195 for LTB<sub>4</sub>,  $m/z$  624  $\rightarrow$  272 for LTC<sub>4</sub>,  $m/z$  495  $\rightarrow$  177 for LTD<sub>4</sub>,  $m/z$   
449 319  $\rightarrow$  115 for 5-HETE,  $m/z$  339  $\rightarrow$  197 for [<sup>2</sup>H<sub>4</sub>]LTB<sub>4</sub>,  $m/z$  629  $\rightarrow$  272 for [<sup>2</sup>H<sub>5</sub>]LTC<sub>4</sub>,  
450  $m/z$  500  $\rightarrow$  177 for [<sup>2</sup>H<sub>5</sub>]LTD<sub>4</sub>,  $m/z$  327  $\rightarrow$  116 for [<sup>2</sup>H<sub>8</sub>]5-HETE. For accurate  
451 quantification, calibration curves were generated for each target eicosanoid using known  
452 reference standards and the same isotope-labeled internal standard. Automated peak  
453 detection, calibration, and calculation were carried out by the Xcalibur 1.2 software  
454 package (Thermo Fisher Scientific).

455

#### 456 **BM transplantation**

457 BM cells were collected from the both femurs and tibiae of donor BLT1-WT and BLT1-  
458 KO (> 20 weeks old) and 10<sup>7</sup> cells were intravenously injected into lethally irradiated (10  
459 Gy X-rays) male WT recipients (> 20 weeks old). At 28 days post-transplantation, mice  
460 were subjected to laser-induced retinal injury, followed by analysis of CNV development.

461

**462 Immunofluorescence staining and analysis**

**463** RPE-choroid complexes were prepared from WT mice as described above and blocked  
**464** with 5% BSA/0.5% Triton X-100 in PBS for 1 h, followed by staining with 10 µg/ml  
**465** anti-BLT1 (clone 7A8; generated in-house) (93) and 5 µg/ml Alexa Fluor 647-labeled  
**466** anti-F4/80 (clone BM8) mAbs. After washing with 0.1% Tween in PBS, tissues were  
**467** incubated with HRP-labeled anti-mouse IgG (500-fold dilution) (Rockland  
**468** Immunochemicals, Limerick, PA, USA), followed by Tyramide-Alexa Fluor 488 (100-  
**469** fold dilution) (Thermo Fisher Scientific). Nuclei were stained with DAPI (5 µg/ml;  
**470** Sigma-Aldrich). Samples were visualized under a confocal microscope (A1R<sup>+</sup>; Nikon).

**471**

**472 Flow cytometry analysis**

**473** BMDMs and RAW264.7 cells were collected in PBS/2 mM EDTA (pH 7.4) containing  
**474** 2% FCS (FACS buffer). Fc receptors were then blocked with an anti-CD16/32 (5 µg/ml;  
**475** 2.4G2) Ab (Fc blocker). BMDMs were stained with anti-F4/80-FITC (5 µg/ml; clone  
**476** BM8), anti-CD11b-allophycocyanin (APC) (2.5 µg/ml; clone M1/70), and biotin-labeled  
**477** anti-mouse BLT1 (5 µg/ml; clone 7A8; generated in-house) Ab (93) or mouse IgG<sub>1</sub> (5  
**478** µg/ml; Thermo Fisher Scientific/eBioscience, San Diego, CA, USA) (as an isotype  
**479** control). RAW264.7 cells were stained with anti-mouse BLT1 (5 µg/ml; clone 7A8), anti-  
**480** PD-L2 (2.5 µg/ml; clone TY25), anti-CD80 (2.5 µg/ml; clone 16-10A1), or isotype  
**481** controls for biotin-labeled anti-mouse Abs. After washing with PBS/EDTA, cells were  
**482** stained with R-phycoerythrin (PE)-conjugated Streptavidin (0.5 µg/ml; Thermo Fisher  
**483** Scientific/eBioscience). THP-1 cells were collected in FACS buffer, blocked with human  
**484** Fc blocker (Miltenyi Biotec, Bergisch Gladbach, Germany) and stained with anti-human  
**485** BLT1 (diluted 1:20; clone 203/14F11) (R&D Systems), anti-PD-L2 (5 µg/ml; clone

486 24F.10C12), anti-CD80 (10 µg/ml; **clone** 2D10), or an isotype control for PE-labeled anti-  
487 human Abs. Cells were analyzed in a flow cytometer (FACSCalibur or LSRFortessa;  
488 Becton Dickinson, Franklin Lakes, NJ, USA). Eyecups were collected from 4–6 laser-  
489 injured eyes as follows: (i) young (8-12 weeks old) or aged (> 20 weeks old) WT mice,  
490 (ii) CP105696- (20 pmol/eye) and DMSO-injected WT mice (> 20 weeks old), and  
491 ocular-infiltrating cells were isolated using Collagenase D (Roche) in RPMI 1640 as  
492 previously described (94). Cells were then incubated with mouse Fc blocker, followed by  
493 staining with anti-CD45-FITC (2.5 µg/ml; **clone** 30-F11) (Becton Dickinson), anti-Ly6G-  
494 PE/Cy7 (2.5 µg/ml; **clone** 1A8), anti-Ly6C-APC/Cy7 (2.5 µg/ml; **clone** HK1.4), anti-  
495 F4/80-Brilliant Violet 421 (2.5 µg/ml; **clone** BM8), anti-CD11b-Brilliant Violet 510 (5  
496 µg/ml; **clone** M1/70), and anti-mouse BLT1-APC (5 µg/ml; **clone** 7A8; generated in-  
497 house) Abs in addition to 2.5 µg/ml anti-PD-L2 (**clone** TY25), 10 µg/ml anti-CD301  
498 (**clone** ER-MP23) (Bio-Rad Laboratories), 10 µg/ml anti-CD206 (**clone** MR5D3) biotin-  
499 conjugated Abs or isotype controls. Cells were washed and stained with 0.5 µg/ml  
500 Streptavidin-PE, and analyzed in a flow cytometer (FACSVerse; Becton Dickinson). For  
501 all experiments, dead cells were excluded after staining with 7AAD (Becton Dickinson).

502

### 503 **Liposome-mediated depletion of macrophages**

504 Aged BLT1-WT and BLT1-KO mice (> 20 weeks old) received an IVI of 90 µg  
505 clodronate liposomes (including 16 µg of clodronic acid; injection volume, 2 µl/eye)  
506 (Katayama Chemical Industries, Osaka, Japan) or control liposomes after laser-induced  
507 injury. RPE-choroid complexes were prepared as described above, stained with Alexa  
508 647-labeled anti-F4/80 mAb or rat IgG<sub>2a</sub> (as an isotype control), and then nuclei were  
509 visualized with DAPI. F4/80<sup>+</sup> macrophages and DAPI<sup>+</sup> cells per field were counted using



510 Image J.

511

512 **Adoptive transfer of macrophages**

513 Aged WT mice received M0, M1, and M2 BMDMs ( $10^5$  cells in PBS/eye; injection

514 volume, 2  $\mu$ l/eye) from aged BLT1-WT or BLT1-KO mice (> 20 weeks old) via IVI after

515 laser-induced injury.

516

517 **Calcium mobilization assay**

518 RAW264.7 cells were incubated for 60 min with HBSS-based loading buffer containing

519 20 mM HEPES (pH 7.4) (Thermo Fisher Scientific), 2.5 mM Probenecid (Sigma-

520 Aldrich), 0.04% Pluronic F-127 (Thermo Fisher Scientific), and 4  $\mu$ M Fluo 4-AM

521 (Dojindo laboratories, Kumamoto, Japan). Cells were then washed with HEPES-based

522 buffer, seeded into 96-well black plates ( $10^4$  cells/well), and stimulated with 0.5–1000

523 nM LTB<sub>4</sub> or 2  $\mu$ M Ionomycin. Assay plates were then analyzed using FlexStation 3

524 (Molecular Devices, Sunnyvale, CA).

525

526 **TAXIScan chemotaxis assay**

527 Chemotaxis of RAW264.7 cells toward 100 nM LTB<sub>4</sub> or ethanol (as a vehicle control)

528 was monitored using TAXIScan-FL (Effector Cell Institute Frontier, Tokyo, Japan), as

529 described previously (95). Phase-contrast sequential images were acquired at 1 min

530 intervals for 45 mins and stacked using Image J. Chemotactic parameters (velocity and

531 directionality) were analyzed with the Image J ‘Manual Tracking’ plug-in and the Image

532 J ‘Chemotaxis and Migration tools’ plug-in.

533

**534 ELISA**

**535** For VEGF-A protein expression analysis, culture media were collected in M2 BMDMs  
**536** from BLT1-WT or BLT1-KO mice after stimulation with 500 nM LTB<sub>4</sub> or ethanol (as a  
**537** vehicle control) for 4 h. VEGF-A was measured culture media using the Mouse VEGF  
**538** Quantikine ELISA Kit (R&D Systems) according to the manufacturer's instructions.

**539**

**540 Statistics**

**541** Data are expressed as the mean  $\pm$  SEM of at least three independent mice or eyes. Two  
**542** data sets were compared using 2-tailed Student's *t* test. Multiple comparisons were  
**543** performed using 1-way ANOVA followed by Bonferroni's, Newman-Keuls, or Dunnett's  
**544** *post hoc* test, and 2-way ANOVA followed by Bonferroni's *post hoc* test. *P* value of less  
**545** than 0.05 was considered statistically significant. All statistical analyses were performed  
**546** using Prism version 5.0 (GraphPad Software, La Jolla, CA).

**547**

**548 Study approval**

**549** All animal studies and procedures were approved by the Ethics Committees on Animal  
**550** Experimentation in Juntendo University (approval numbers 250224, 260166, 270161,  
**551** 280167, and 290171). All the studies in this manuscript were carried out in accordance  
**552** with approved guidelines and regulations.

**553 AUTHOR CONTRIBUTIONS**

**554** F.S. and T.Y. designed all experiments. F.S., M.O., K.I., H.A., and M.R.K. performed the  
**555** experiments. T.K., M.O., K.S., T.O., K.I., T.N., S.N., S. Y., T.I., H.A., M.R.K., A.H.M.,  
**556** J.M.P., K.H.S., and T.Y. helped acquiring and analyzing data. T.Y. performed conducting  
**557** experiments. F.S., A.H.M., and T.Y. wrote the manuscript.

**558 ACKNOWLEDGMENTS**

**559** This work was supported by Grants-in-Aid for Scientific Research (KAKENHI) from the  
**560** Ministry of Education, Culture, Sports, Science, and Technology (MEXT) of the Japan  
**561** Society for the Promotion of Science (JSPS) (grant numbers 22116001, 22116002,  
**562** 15H05897, 15H05904, 15H04708, and 18H02627 to TY, 25860223, 15K19032 and  
**563** 17K08664 to TK, 24590386, 15K08316, and 18K06923 to KS, 25460374, 16K08596 and  
**564** 15KK0320 to TO) and by grants from the Naito Foundation, the Ono Medical Research  
**565** Foundation, the Uehara Memorial Foundation, the Mitsubishi Foundation, and the Takeda  
**566** Science Foundation. This study was supported in part by a Grant-in-Aid (S1311011 to  
**567** TY) from the Foundation for Strategic Research Projects in Private Universities of the  
**568** MEXT and by a grant from the Institute for Environmental and Gender-Specific  
**569** Medicine. We thank the Research Center for Human Disease Modeling (Kyushu  
**570** University), the Research Support Center of the Division of Molecular and Biochemical  
**571** Research (Juntendo University), and the Imaging Core Laboratory, the Institute of  
**572** Medical Science (The University of Tokyo) for technical support. We also thank Dr.  
**573** Eiichi Hasegawa (Harvard Medical School, Boston, MA) and Dr. Akihiko Yoshimura  
**574** (Keio University, Tokyo, Japan) for technical support of AMD model and BM  
**575** transplantation, Dr. Takako Ichiki (California Institute of Technology, Pasadena, CA) for  
**576** technical support of chemotaxis assay, Dr. Miki Honda (Juntendo University), Dr. Akira  
**577** Matsuda (Juntendo University), and the members of our laboratory for advice and helpful  
**578** discussion. The authors declare no competing financial interests.

**579 REFERENCES**

- 580** 1. World Health Organization. Global data on visual impairment 2010.  
**581** <http://www.who.int/blindness/publications/globaldata/en/>. WHO Web site.  
**582** Accessed November 1, 2016.
- 583** 2. Ambati J, Atkinson JP, and Gelfand BD. Immunology of age-related macular  
**584** degeneration. *Nat Rev Immunol*. 2013;13(6):438-451.
- 585** 3. Carr AJ, Smart MJ, Ramsden CM, Powner MB, da Cruz L, and Coffey PJ.  
**586** Development of human embryonic stem cell therapies for age-related macular  
**587** degeneration. *Trends Neurosci*. 2013;36(7):385-395.
- 588** 4. Fritsche LG, Fariss RN, Stambolian D, Abecasis GR, Curcio CA, and Swaroop  
**589** A. Age-related macular degeneration: genetics and biology coming together. *Annu*  
**590** *Rev Genomics Hum Genet*. 2014;15:151-171.
- 591** 5. Falavarjani KG, and Nguyen QD. Adverse events and complications associated  
**592** with intravitreal injection of anti-VEGF agents: a review of literature. *Eye (Lond)*.  
**593** 2013;27(7):787-794.
- 594** 6. Yokomizo T, Izumi T, Chang K, Takuwa Y, and Shimizu T. A G-protein-coupled  
**595** receptor for leukotriene B<sub>4</sub> that mediates chemotaxis. *Nature*.  
**596** 1997;387(6633):620-624.
- 597** 7. Afonso PV, Janka-Junttila M, Lee YJ, McCann CP, Oliver CM, Aamer KA, Losert  
**598** W, Cicerone MT, and Parent CA. LTB<sub>4</sub> is a signal-relay molecule during  
**599** neutrophil chemotaxis. *Dev Cell*. 2012;22(5):1079-1091.
- 600** 8. Lammermann T, Afonso PV, Angermann BR, Wang JM, Kastenmuller W, Parent  
**601** CA, and Germain RN. Neutrophil swarms require LTB<sub>4</sub> and integrins at sites of  
**602** cell death in vivo. *Nature*. 2013;498(7454):371-375.

- 603 9. Nakamura M, and Shimizu T. Leukotriene receptors. *Chem Rev*.  
604 2011;111(10):6231-6298.
- 605 10. Yokomizo T. Two distinct leukotriene B4 receptors, BLT1 and BLT2. *J Biochem*.  
606 2015;157(2):65-71.
- 607 11. Tager AM, Dufour JH, Goodarzi K, Bercury SD, von Andrian UH, and Luster  
608 AD. BLTR mediates leukotriene B(4)-induced chemotaxis and adhesion and plays  
609 a dominant role in eosinophil accumulation in a murine model of peritonitis. *J*  
610 *Exp Med*. 2000;192(3):439-446.
- 611 12. Tager AM, Bromley SK, Medoff BD, Islam SA, Bercury SD, Friedrich EB,  
612 Carafone AD, Gerszten RE, and Luster AD. Leukotriene B4 receptor BLT1  
613 mediates early effector T cell recruitment. *Nat Immunol*. 2003;4(10):982-990.
- 614 13. Terawaki K, Yokomizo T, Nagase T, Toda A, Taniguchi M, Hashizume K, Yagi T,  
615 and Shimizu T. Absence of leukotriene B4 receptor 1 confers resistance to airway  
616 hyperresponsiveness and Th2-type immune responses. *J Immunol*.  
617 2005;175(7):4217-4225.
- 618 14. Toda A, Terawaki K, Yamazaki S, Saeki K, Shimizu T, and Yokomizo T.  
619 Attenuated Th1 induction by dendritic cells from mice deficient in the leukotriene  
620 B4 receptor 1. *Biochimie*. 2010;92(6):682-691.
- 621 15. Kim ND, Chou RC, Seung E, Tager AM, and Luster AD. A unique requirement  
622 for the leukotriene B4 receptor BLT1 for neutrophil recruitment in inflammatory  
623 arthritis. *J Exp Med*. 2006;203(4):829-835.
- 624 16. Subbarao K, Jala VR, Mathis S, Suttles J, Zacharias W, Ahamed J, Ali H, Tseng  
625 MT, and Haribabu B. Role of leukotriene B4 receptors in the development of  
626 atherosclerosis: potential mechanisms. *Arterioscler Thromb Vasc Biol*.

- 627 2004;24(2):369-375.
- 628 17. Back M, Bu DX, Branstrom R, Sheikine Y, Yan ZQ, and Hansson GK.  
629 Leukotriene B4 signaling through NF-kappaB-dependent BLT1 receptors on  
630 vascular smooth muscle cells in atherosclerosis and intimal hyperplasia. *Proc Natl*  
631 *Acad Sci U S A*. 2005;102(48):17501-17506.
- 632 18. Kihara Y, Yokomizo T, Kunita A, Morishita Y, Fukayama M, Ishii S, and Shimizu  
633 T. The leukotriene B4 receptor, BLT1, is required for the induction of  
634 experimental autoimmune encephalomyelitis. *Biochem Biophys Res Commun*.  
635 2010;394(3):673-678.
- 636 19. Sumida H, Yanagida K, Kita Y, Abe J, Matsushima K, Nakamura M, Ishii S, Sato  
637 S, and Shimizu T. Interplay between CXCR2 and BLT1 facilitates neutrophil  
638 infiltration and resultant keratinocyte activation in a murine model of imiquimod-  
639 induced psoriasis. *J Immunol*. 2014;192(9):4361-4369.
- 640 20. Li P, Oh DY, Bandyopadhyay G, Lagakos WS, Talukdar S, Osborn O, Johnson A,  
641 Chung H, Mayoral R, Maris M, et al. LTB4 promotes insulin resistance in obese  
642 mice by acting on macrophages, hepatocytes and myocytes. *Nat Med*.  
643 2015;21(3):239-247.
- 644 21. Pelegrin P, and Surprenant A. Dynamics of macrophage polarization reveal new  
645 mechanism to inhibit IL-1beta release through pyrophosphates. *EMBO J*.  
646 2009;28(14):2114-2127.
- 647 22. Sindrilaru A, Peters T, Wieschalka S, Baican C, Baican A, Peter H, Hainzl A,  
648 Schatz S, Qi Y, Schlecht A, et al. An unrestrained proinflammatory M1  
649 macrophage population induced by iron impairs wound healing in humans and  
650 mice. *J Clin Invest*. 2011;121(3):985-997.

- 651 23. Xu H, Zhu J, Smith S, Foldi J, Zhao B, Chung AY, Outtz H, Kitajewski J, Shi C,  
652 Weber S, et al. Notch-RBP-J signaling regulates the transcription factor IRF8 to  
653 promote inflammatory macrophage polarization. *Nat Immunol.* 2012;13(7):642-  
654 650.
- 655 24. Klug F, Prakash H, Huber PE, Seibel T, Bender N, Halama N, Pfirschke C, Voss  
656 RH, Timke C, Umansky L, et al. Low-dose irradiation programs macrophage  
657 differentiation to an iNOS(+)/M1 phenotype that orchestrates effective T cell  
658 immunotherapy. *Cancer Cell.* 2013;24(5):589-602.
- 659 25. Lu G, Zhang R, Geng S, Peng L, Jayaraman P, Chen C, Xu F, Yang J, Li Q, Zheng  
660 H, et al. Myeloid cell-derived inducible nitric oxide synthase suppresses M1  
661 macrophage polarization. *Nat Commun.* 2015;6:6676.
- 662 26. Verreck FA, de Boer T, Langenberg DM, Hoeve MA, Kramer M, Vaisberg E,  
663 Kastelein R, Kolk A, de Waal-Malefyt R, and Ottenhoff TH. Human IL-23-  
664 producing type 1 macrophages promote but IL-10-producing type 2 macrophages  
665 subvert immunity to (myco)bacteria. *Proc Natl Acad Sci U S A.*  
666 2004;101(13):4560-4565.
- 667 27. Iwata Y, Bostrom EA, Menke J, Rabacal WA, Morel L, Wada T, and Kelley VR.  
668 Aberrant macrophages mediate defective kidney repair that triggers nephritis in  
669 lupus-susceptible mice. *J Immunol.* 2012;188(9):4568-4580.
- 670 28. Bayer C, Varani S, Wang L, Walther P, Zhou S, Straschewski S, Bachem M,  
671 Soderberg-Naucler C, Mertens T, and Frascaroli G. Human cytomegalovirus  
672 infection of M1 and M2 macrophages triggers inflammation and autologous T-  
673 cell proliferation. *J Virol.* 2013;87(1):67-79.
- 674 29. Deng T, Lyon CJ, Minze LJ, Lin J, Zou J, Liu JZ, Ren Y, Yin Z, Hamilton DJ,



- 675 Reardon PR, et al. Class II major histocompatibility complex plays an essential  
676 role in obesity-induced adipose inflammation. *Cell Metab.* 2013;17(3):411-422.
- 677 30. Cucak H, Grunnet LG, and Rosendahl A. Accumulation of M1-like macrophages  
678 in type 2 diabetic islets is followed by a systemic shift in macrophage polarization.  
679 *J Leukoc Biol.* 2014;95(1):149-160.
- 680 31. Biswas SK, and Mantovani A. Macrophage plasticity and interaction with  
681 lymphocyte subsets: cancer as a paradigm. *Nat Immunol.* 2010;11(10):889-896.
- 682 32. Satoh T, Takeuchi O, Vandenbon A, Yasuda K, Tanaka Y, Kumagai Y, Miyake T,  
683 Matsushita K, Okazaki T, Saitoh T, et al. The Jmjd3-Irf4 axis regulates M2  
684 macrophage polarization and host responses against helminth infection. *Nat*  
685 *Immunol.* 2010;11(10):936-944.
- 686 33. Egawa M, Mukai K, Yoshikawa S, Iki M, Mukaida N, Kawano Y, Minegishi Y,  
687 and Karasuyama H. Inflammatory monocytes recruited to allergic skin acquire an  
688 anti-inflammatory M2 phenotype via basophil-derived interleukin-4. *Immunity.*  
689 2013;38(3):570-580.
- 690 34. Odegaard JI, Ricardo-Gonzalez RR, Goforth MH, Morel CR, Subramanian V,  
691 Mukundan L, Red Eagle A, Vats D, Brombacher F, Ferrante AW, et al.  
692 Macrophage-specific PPARgamma controls alternative activation and improves  
693 insulin resistance. *Nature.* 2007;447(7148):1116-1120.
- 694 35. Satoh T, Kidoya H, Naito H, Yamamoto M, Takemura N, Nakagawa K, Yoshioka  
695 Y, Morii E, Takakura N, Takeuchi O, et al. Critical role of Trib1 in differentiation  
696 of tissue-resident M2-like macrophages. *Nature.* 2013;495(7442):524-528.
- 697 36. Colegio OR, Chu NQ, Szabo AL, Chu T, Rhebergen AM, Jairam V, Cyrus N,  
698 Brokowski CE, Eisenbarth SC, Phillips GM, et al. Functional polarization of

- 699 tumour-associated macrophages by tumour-derived lactic acid. *Nature*.  
700 2014;513(7519):559-563.
- 701 37. Shaul ME, Bennett G, Strissel KJ, Greenberg AS, and Obin MS. Dynamic, M2-  
702 like remodeling phenotypes of CD11c+ adipose tissue macrophages during high-  
703 fat diet--induced obesity in mice. *Diabetes*. 2010;59(5):1171-1181.
- 704 38. Marchetti V, Yanes O, Aguilar E, Wang M, Friedlander D, Moreno S, Storm K,  
705 Zhan M, Naccache S, Nemerow G, et al. Differential macrophage polarization  
706 promotes tissue remodeling and repair in a model of ischemic retinopathy. *Sci*  
707 *Rep*. 2011;1:76.
- 708 39. Shechter R, Miller O, Yovel G, Rosenzweig N, London A, Ruckh J, Kim KW,  
709 Klein E, Kalchenko V, Bendel P, et al. Recruitment of beneficial M2 macrophages  
710 to injured spinal cord is orchestrated by remote brain choroid plexus. *Immunity*.  
711 2013;38(3):555-569.
- 712 40. Huber S, Hoffmann R, Muskens F, and Voehringer D. Alternatively activated  
713 macrophages inhibit T-cell proliferation by Stat6-dependent expression of PD-L2.  
714 *Blood*. 2010;116(17):3311-3320.
- 715 41. Spite M, Hellmann J, Tang Y, Mathis SP, Kosuri M, Bhatnagar A, Jala VR, and  
716 Haribabu B. Deficiency of the leukotriene B4 receptor, BLT-1, protects against  
717 systemic insulin resistance in diet-induced obesity. *J Immunol*. 2011;187(4):1942-  
718 1949.
- 719 42. Parsa R, Andresen P, Gillett A, Mia S, Zhang XM, Mayans S, Holmberg D, and  
720 Harris RA. Adoptive transfer of immunomodulatory M2 macrophages prevents  
721 type 1 diabetes in NOD mice. *Diabetes*. 2012;61(11):2881-2892.
- 722 43. Huang SC, Everts B, Ivanova Y, O'Sullivan D, Nascimento M, Smith AM, Beatty

- 723 W, Love-Gregory L, Lam WY, O'Neill CM, et al. Cell-intrinsic lysosomal  
724 lipolysis is essential for alternative activation of macrophages. *Nat Immunol.*  
725 2014;15(9):846-855.
- 726 44. Shiraishi M, Shintani Y, Shintani Y, Ishida H, Saba R, Yamaguchi A, Adachi H,  
727 Yashiro K, and Suzuki K. Alternatively activated macrophages determine repair  
728 of the infarcted adult murine heart. *J Clin Invest.* 2016;126(6):2151-2166.
- 729 45. Liao X, Sharma N, Kapadia F, Zhou G, Lu Y, Hong H, Paruchuri K,  
730 Mahabeleshwar GH, Dalmas E, Venteclef N, et al. Kruppel-like factor 4 regulates  
731 macrophage polarization. *J Clin Invest.* 2011;121(7):2736-2749.
- 732 46. Arranz A, Doxaki C, Vergadi E, Martinez de la Torre Y, Vaporidi K, Lagoudaki  
733 ED, Ieronymaki E, Androulidaki A, Venihaki M, Margioris AN, et al. Akt1 and  
734 Akt2 protein kinases differentially contribute to macrophage polarization. *Proc*  
735 *Natl Acad Sci U S A.* 2012;109(24):9517-9522.
- 736 47. Han MS, Jung DY, Morel C, Lakhani SA, Kim JK, Flavell RA, and Davis RJ.  
737 JNK expression by macrophages promotes obesity-induced insulin resistance and  
738 inflammation. *Science.* 2013;339(6116):218-222.
- 739 48. Neves J, Zhu J, Sousa-Victor P, Konjikusic M, Riley R, Chew S, Qi Y, Jasper H,  
740 and Lamba DA. Immune modulation by MANF promotes tissue repair and  
741 regenerative success in the retina. *Science.* 2016;353(6294):aaf3646.
- 742 49. Nakao S, Noda K, Zandi S, Sun D, Taher M, Schering A, Xie F, Mashima Y, and  
743 Hafezi-Moghadam A. VAP-1-mediated M2 macrophage infiltration underlies IL-  
744 1beta- but not VEGF-A-induced lymph- and angiogenesis. *Am J Pathol.*  
745 2011;178(4):1913-1921.
- 746 50. Horie S, Robbie SJ, Liu J, Wu WK, Ali RR, Bainbridge JW, Nicholson LB,

- 747 Mochizuki M, Dick AD, and Copland DA. CD200R signaling inhibits pro-  
748 angiogenic gene expression by macrophages and suppresses choroidal  
749 neovascularization. *Sci Rep.* 2013;3:3072.
- 750 51. Sene A, Khan AA, Cox D, Nakamura RE, Santeford A, Kim BM, Sidhu R, Onken  
751 MD, Harbour JW, Hagbi-Levi S, et al. Impaired cholesterol efflux in senescent  
752 macrophages promotes age-related macular degeneration. *Cell Metab.*  
753 2013;17(4):549-561.
- 754 52. Nakamura R, Sene A, Santeford A, Gdoura A, Kubota S, Zapata N, and Apte RS.  
755 IL10-driven STAT3 signalling in senescent macrophages promotes pathological  
756 eye angiogenesis. *Nat Commun.* 2015;6:7847.
- 757 53. Zandi S, Nakao S, Chun KH, Fiorina P, Sun D, Arita R, Zhao M, Kim E, Schueller  
758 O, Campbell S, et al. ROCK-isoform-specific polarization of macrophages  
759 associated with age-related macular degeneration. *Cell Rep.* 2015;10(7):1173-  
760 1186.
- 761 54. Lv J, Xiong Y, Li W, Yang W, Zhao L, and He R. BLT1 Mediates Bleomycin-  
762 Induced Lung Fibrosis Independently of Neutrophils and CD4+ T Cells. *J*  
763 *Immunol.* 2017;198(4):1673-1684.
- 764 55. Ying W, Wollam J, Ofrecio JM, Bandyopadhyay G, El Ouarrat D, Lee YS, Oh  
765 DY, Li P, Osborn O, and Olefsky JM. Adipose tissue B2 cells promote insulin  
766 resistance through leukotriene LTB4/LTB4R1 signaling. *J Clin Invest.*  
767 2017;127(3):1019-1030.
- 768 56. Bodduluri SR, Mathis S, Maturu P, Krishnan E, Satpathy SR, Chilton PM,  
769 Mitchell TC, Lira S, Locati M, Mantovani A, et al. Mast Cell-Dependent CD8(+)  
770 T-cell Recruitment Mediates Immune Surveillance of Intestinal Tumors in

- 771 Apc(Min/+) Mice. *Cancer Immunol Res.* 2018.
- 772 57. Lambert V, Lecomte J, Hansen S, Blacher S, Gonzalez ML, Struman I, Sounni  
773 NE, Rozet E, de Tullio P, Foidart JM, et al. Laser-induced choroidal  
774 neovascularization model to study age-related macular degeneration in mice. *Nat*  
775 *Protoc.* 2013;8(11):2197-2211.
- 776 58. Ferrara N, Mass RD, Campa C, and Kim R. Targeting VEGF-A to treat cancer  
777 and age-related macular degeneration. *Annu Rev Med.* 2007;58:491-504.
- 778 59. Ishikawa K, Kannan R, and Hinton DR. Molecular mechanisms of subretinal  
779 fibrosis in age-related macular degeneration. *Exp Eye Res.* 2016;142:19-25.
- 780 60. Ambati J, Anand A, Fernandez S, Sakurai E, Lynn BC, Kuziel WA, Rollins BJ,  
781 and Ambati BK. An animal model of age-related macular degeneration in  
782 senescent Ccl-2- or Ccr-2-deficient mice. *Nat Med.* 2003;9(11):1390-1397.
- 783 61. Takeda A, Baffi JZ, Kleinman ME, Cho WG, Nozaki M, Yamada K, Kaneko H,  
784 Albuquerque RJ, Dridi S, Saito K, et al. CCR3 is a target for age-related macular  
785 degeneration diagnosis and therapy. *Nature.* 2009;460(7252):225-230.
- 786 62. Yokomizo T, Kato K, Terawaki K, Izumi T, and Shimizu T. A second leukotriene  
787 B(4) receptor, BLT2. A new therapeutic target in inflammation and  
788 immunological disorders. *J Exp Med.* 2000;192(3):421-432.
- 789 63. Okuno T, Iizuka Y, Okazaki H, Yokomizo T, Taguchi R, and Shimizu T. 12(S)-  
790 Hydroxyheptadeca-5Z, 8E, 10E-trienoic acid is a natural ligand for leukotriene  
791 B4 receptor 2. *J Exp Med.* 2008;205(4):759-766.
- 792 64. Iizuka Y, Okuno T, Saeki K, Uozaki H, Okada S, Misaka T, Sato T, Toh H,  
793 Fukayama M, Takeda N, et al. Protective role of the leukotriene B4 receptor BLT2  
794 in murine inflammatory colitis. *FASEB J.* 2010;24(12):4678-4690.

- 795 65. Liu M, Saeki K, Matsunobu T, Okuno T, Koga T, Sugimoto Y, Yokoyama C,  
796 Nakamizo S, Kabashima K, Narumiya S, et al. 12-Hydroxyheptadecatrienoic acid  
797 promotes epidermal wound healing by accelerating keratinocyte migration via the  
798 BLT2 receptor. *J Exp Med.* 2014;211(6):1063-1078.
- 799 66. Shigematsu M, Koga T, Ishimori A, Saeki K, Ishii Y, Taketomi Y, Ohba M, Jo-  
800 Watanabe A, Okuno T, Harada N, et al. Leukotriene B4 receptor type 2 protects  
801 against pneumolysin-dependent acute lung injury. *Sci Rep.* 2016;6:34560.
- 802 67. Talahalli R, Zarini S, Sheibani N, Murphy RC, and Gubitosi-Klug RA. Increased  
803 synthesis of leukotrienes in the mouse model of diabetic retinopathy. *Invest*  
804 *Ophthalmol Vis Sci.* 2010;51(3):1699-1708.
- 805 68. Subramanian P, Mendez EF, and Becerra SP. A Novel Inhibitor of 5-Lipoxygenase  
806 (5-LOX) Prevents Oxidative Stress-Induced Cell Death of Retinal Pigment  
807 Epithelium (RPE) Cells. *Invest Ophthalmol Vis Sci.* 2016;57(11):4581-4588.
- 808 69. Espinosa-Heidmann DG, Caicedo A, Hernandez EP, Csaky KG, and Cousins SW.  
809 Bone marrow-derived progenitor cells contribute to experimental choroidal  
810 neovascularization. *Invest Ophthalmol Vis Sci.* 2003;44(11):4914-4919.
- 811 70. Kezic JM, and McMenamin PG. The effects of CX3CR1 deficiency and  
812 irradiation on the homing of monocyte-derived cell populations in the mouse eye.  
813 *PLoS One.* 2013;8(7):e68570.
- 814 71. Espinosa-Heidmann DG, Malek G, Mettu PS, Caicedo A, Saloupis P, Gach S,  
815 Dunnon AK, Hu P, Spiga MG, and Cousins SW. Bone marrow transplantation  
816 transfers age-related susceptibility to neovascular remodeling in murine laser-  
817 induced choroidal neovascularization. *Invest Ophthalmol Vis Sci.*  
818 2013;54(12):7439-7449.

- 819 72. Singh V, Jaini R, Torricelli AA, Tuohy VK, and Wilson SE. A method to generate  
820 enhanced GFP+ chimeric mice to study the role of bone marrow-derived cells in  
821 the eye. *Exp Eye Res.* 2013;116:366-370.
- 822 73. O'Koren EG, Mathew R, and Saban DR. Fate mapping reveals that microglia and  
823 recruited monocyte-derived macrophages are definitively distinguishable by  
824 phenotype in the retina. *Sci Rep.* 2016;6:20636.
- 825 74. Sakurai E, Anand A, Ambati BK, van Rooijen N, and Ambati J. Macrophage  
826 depletion inhibits experimental choroidal neovascularization. *Invest Ophthalmol*  
827 *Vis Sci.* 2003;44(8):3578-3585.
- 828 75. Zhou W, Ke SQ, Huang Z, Flavahan W, Fang X, Paul J, Wu L, Sloan AE,  
829 McLendon RE, Li X, et al. Periostin secreted by glioblastoma stem cells recruits  
830 M2 tumour-associated macrophages and promotes malignant growth. *Nat Cell*  
831 *Biol.* 2015;17(2):170-182.
- 832 76. Kuniyeda K, Okuno T, Terawaki K, Miyano M, Yokomizo T, and Shimizu T.  
833 Identification of the intracellular region of the leukotriene B4 receptor type 1 that  
834 is specifically involved in Gi activation. *J Biol Chem.* 2007;282(6):3998-4006.
- 835 77. Bacci M, Capobianco A, Monno A, Cottone L, Di Puppo F, Camisa B, Mariani  
836 M, Brignole C, Ponzoni M, Ferrari S, et al. Macrophages are alternatively  
837 activated in patients with endometriosis and required for growth and  
838 vascularization of lesions in a mouse model of disease. *Am J Pathol.*  
839 2009;175(2):547-556.
- 840 78. Hughes R, Qian BZ, Rowan C, Muthana M, Keklikoglou I, Olson OC, Tazzyman  
841 S, Danson S, Addison C, Clemons M, et al. Perivascular M2 Macrophages  
842 Stimulate Tumor Relapse after Chemotherapy. *Cancer Res.* 2015;75(17):3479-

- 843 3491.
- 844 79. Zhou Y, Yoshida S, Nakao S, Yoshimura T, Kobayashi Y, Nakama T, Kubo Y,  
845 Miyawaki K, Yamaguchi M, Ishikawa K, et al. M2 Macrophages Enhance  
846 Pathological Neovascularization in the Mouse Model of Oxygen-Induced  
847 Retinopathy. *Invest Ophthalmol Vis Sci.* 2015;56(8):4767-4777.
- 848 80. Griffiths RJ, Pettipher ER, Koch K, Farrell CA, Breslow R, Conklyn MJ, Smith  
849 MA, Hackman BC, Wimberly DJ, Milici AJ, et al. Leukotriene B4 plays a critical  
850 role in the progression of collagen-induced arthritis. *Proc Natl Acad Sci U S A.*  
851 1995;92(2):517-521.
- 852 81. Mathis SP, Jala VR, Lee DM, and Haribabu B. Nonredundant roles for leukotriene  
853 B4 receptors BLT1 and BLT2 in inflammatory arthritis. *J Immunol.*  
854 2010;185(5):3049-3056.
- 855 82. Okamoto F, Saeki K, Sumimoto H, Yamasaki S, and Yokomizo T. Leukotriene B4  
856 augments and restores Fc gammaRs-dependent phagocytosis in macrophages. *J*  
857 *Biol Chem.* 2010;285(52):41113-41121.
- 858 83. Funk CD. Leukotriene modifiers as potential therapeutics for cardiovascular  
859 disease. *Nat Rev Drug Discov.* 2005;4(8):664-672.
- 860 84. Wickstrom M, Larsson R, Nygren P, and Gullbo J. Aminopeptidase N (CD13) as  
861 a target for cancer chemotherapy. *Cancer Sci.* 2011;102(3):501-508.
- 862 85. Saeki K, and Yokomizo T. Identification, signaling, and functions of LTB4  
863 receptors. *Semin Immunol.* 2017;33:30-36.
- 864 86. Iwamoto S, Koga T, Ohba M, Okuno T, Koike M, Murakami A, Matsuda A, and  
865 Yokomizo T. Non-steroidal anti-inflammatory drug delays corneal wound healing  
866 by reducing production of 12-hydroxyheptadecatrienoic acid, a ligand for



- 867 leukotriene B4 receptor 2. *Sci Rep.* 2017;7(1):13267.
- 868 87. Group CR, Martin DF, Maguire MG, Ying GS, Grunwald JE, Fine SL, and Jaffe  
869 GJ. Ranibizumab and bevacizumab for neovascular age-related macular  
870 degeneration. *N Engl J Med.* 2011;364(20):1897-1908.
- 871 88. Syed BA, Evans JB, and Bielory L. Wet AMD market. *Nat Rev Drug Discov.*  
872 2012;11(11):827.
- 873 89. Gao S, Li C, Zhu Y, Wang Y, Sui A, Zhong Y, Xie B, and Shen X. PEDF mediates  
874 pathological neovascularization by regulating macrophage recruitment and  
875 polarization in the mouse model of oxygen-induced retinopathy. *Sci Rep.*  
876 2017;7:42846.
- 877 90. Nakama T, Yoshida S, Ishikawa K, Kubo Y, Kobayashi Y, Zhou Y, Nakao S,  
878 Hisatomi T, Ikeda Y, Takao K, et al. Therapeutic Effect of Novel Single-Stranded  
879 RNAi Agent Targeting Periostin in Eyes with Retinal Neovascularization. *Mol*  
880 *Ther Nucleic Acids.* 2017;6:279-289.
- 881 91. Matsunobu T, Okuno T, Yokoyama C, and Yokomizo T. Thromboxane A  
882 synthase-independent production of 12-hydroxyheptadecatrienoic acid, a BLT2  
883 ligand. *J Lipid Res.* 2013;54(11):2979-2987.
- 884 92. Okuno T, Gijon MA, Zarini S, Martin SA, Barkley RM, Johnson CA, Ohba M,  
885 Yokomizo T, and Murphy RC. Altered eicosanoid production and phospholipid  
886 remodeling during cell culture. *J Lipid Res.* 2018;59(3):542-549.
- 887 93. Sasaki F, Koga T, Saeki K, Okuno T, Kazuno S, Fujimura T, Ohkawa Y, and  
888 Yokomizo T. Biochemical and immunological characterization of a novel  
889 monoclonal antibody against mouse leukotriene B4 receptor 1. *PLoS One.*  
890 2017;12(9):e0185133.

- 891** 94. Tsutsumi-Miyahara C, Sonoda KH, Egashira K, Ishibashi M, Qiao H, Oshima T,  
**892** Murata T, Miyazaki M, Charo IF, Hamano S, et al. The relative contributions of  
**893** each subset of ocular infiltrated cells in experimental choroidal  
**894** neovascularisation. *Br J Ophthalmol.* 2004;88(9):1217-1222.
- 895** 95. Ichiki T, Koga T, Okuno T, Saeki K, Yamamoto Y, Yamamoto H, Sakaguchi M,  
**896** and Yokomizo T. Modulation of leukotriene B4 receptor 1 signaling by receptor  
**897** for advanced glycation end products (RAGE). *FASEB J.* 2016;30(5):1811-1822.

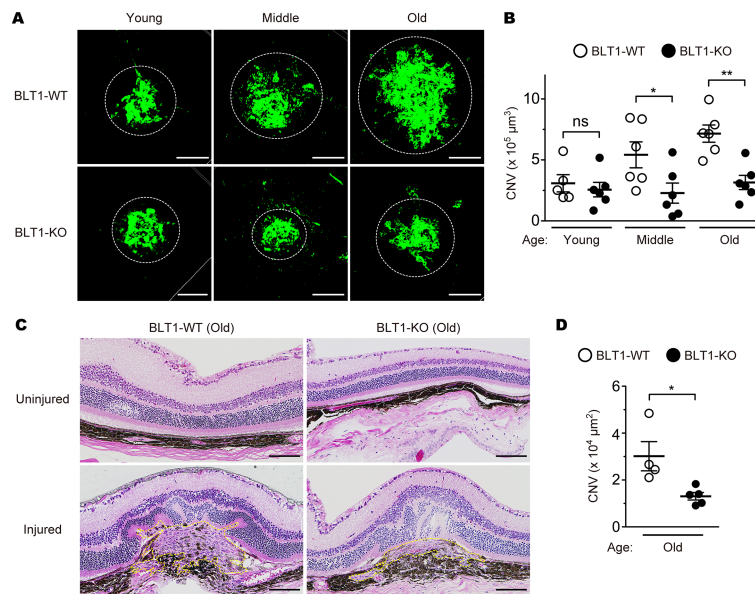

**898 Figure 1. BLT1 deficiency attenuates CNV in a mouse model of AMD.**

**899** Images of isolectin B4 (iB4) staining (A) and CNV volume (B) in the RPE-choroid  
**900** complex from the eyes of BLT1-WT (open circles) and BLT1-KO (filled circles) mice  
**901** after laser-induced injury. Green represents a CNV area positive for iB4 staining. Mice  
**902** were grouped by age: Young, 8–12 weeks old; Middle-aged, 20–24 weeks old; Old, 40–  
**903** 48 weeks old.  $n=5-6$  mice per group. (C, D) H&E staining of the uninjured and laser-  
**904** injured retinas from aged BLT1-WT and BLT1-KO mice (> 40 weeks old). Yellow dotted  
**905** lines denote the lesion areas.  $n=4-5$  per group. Bar=100  $\mu\text{m}$  (A, C). (B, D)  $*P < 0.05$ ;  
**906**  $**P < 0.01$ ; ns, not significant (1-way ANOVA with Bonferroni's *post hoc* test [B] and  
**907** Student's *t* test [D]). Results are representative of at least two independent experiments.

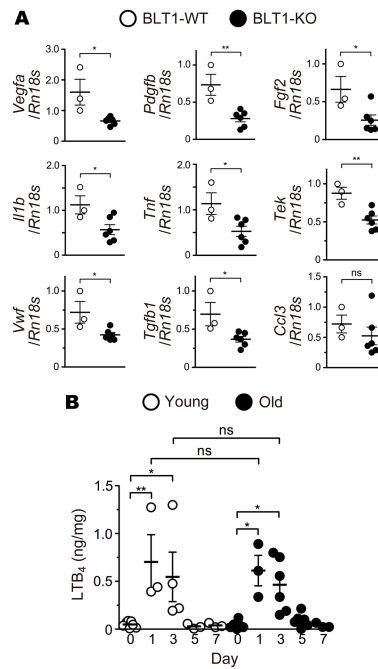

908 **Figure 2. BLT1 deficiency reduces expression of pro-angiogenic and pro-fibrotic**  
 909 **factors in the laser-induced eyes.**  
 910 (A) Quantitative RT-PCR analysis of mRNA for various pro-angiogenic and pro-fibrotic  
 911 factors, cytokines, and chemokines in the eyes from aged BLT1-WT (white bars) and  
 912 BLT1-KO (black bars) mice (> 20 weeks old) on Day 7 post-laser injury.  $n=3-6$  per group.  
 913 (B) Time-dependent changes in LTB<sub>4</sub> content in laser-injured eyes from young (white  
 914 bars) and old (black bars) WT mice (Young, 8 weeks old; Old, > 20 weeks old).  $n=3-7$   
 915 per group. (A, B)  $*P < 0.05$ ;  $**P < 0.01$ ; ns, not significant (Student's *t* test [A] and 1-  
 916 way ANOVA with Bonferroni's *post hoc* test [B]). Results are representative of at least  
 917 two independent experiments.

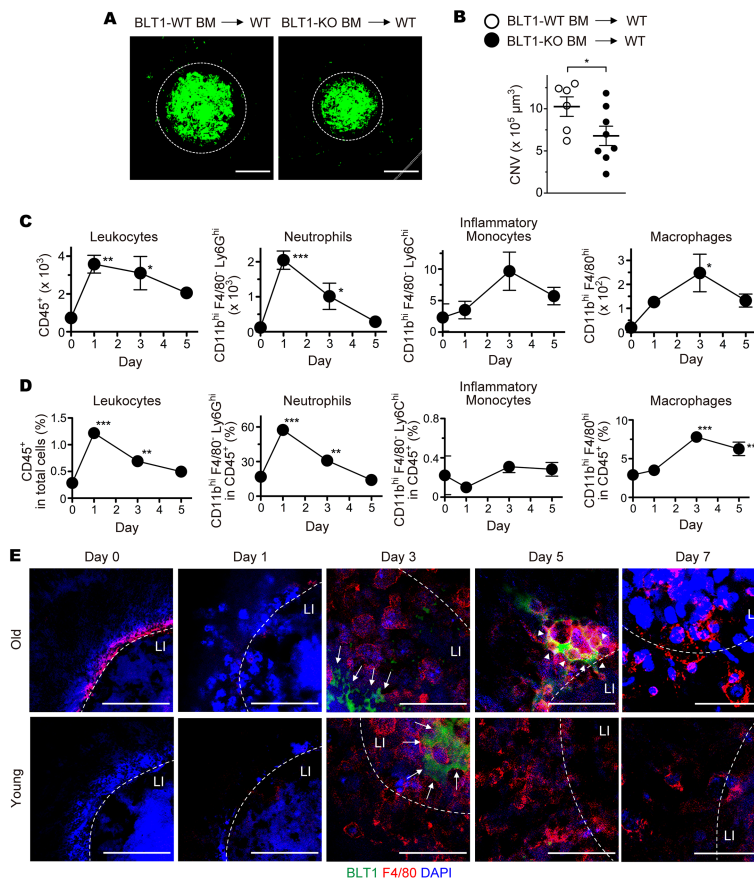

**918** **Figure 3. BLT1-expressing macrophages are recruited to the periphery of laser-**  
**919** **induced CNV.**

**920** Images of iB4 staining (A) and CNV volume (B) in the RPE-choroid of chimeric mice  
**921** receiving BM cells from aged BLT1-WT (open circles) or BLT1-KO (filled circles) mice  
**922** (> 20 weeks old).  $n=6-8$  mice per group. (C, D) FACS analysis of cells isolated from the  
**923** laser-injured eyes of aged WT mice (> 20 weeks old). The populations of the leukocytes  
**924** are gated as follows: total leukocytes:  $CD45^+$ , neutrophils:  $CD11b^{hi} F4/80^- Ly6G^+$ ,  
**925** inflammatory monocytes:  $CD11b^{hi} F4/80^- Ly6C^+$ , macrophages:  $CD11b^{hi} F4/80^{hi}$ . The  
**926** numbers (C) and percentages (D) of the leukocyte populations were analyzed on Day 1,  
**927** Day 3, and Day 5 post-laser injury. Day 0 refers to a sample taken from uninjured eyes.  
**928**  $n=3-4$  per group. (E) Immunofluorescence staining of the laser-injured RPE-choroids  
**929** from WT mice (Young, 8 weeks old; Old, > 20 weeks old) with anti-F4/80 (red) and -  
**930** BLT1 (green) mAbs. Nuclei were visualized with DAPI (blue). LI (white dotted lines)  
**931** denotes the location of laser injury. White arrows show F4/80-negative and BLT1-  
**932** positive cells. White arrowheads show F4/80- and BLT1-double positive cells. Bar=100  
**933**  $\mu m$  (A) or 50  $\mu m$  (E). (B)  $*P < 0.05$  (Student's *t* test). (C, D)  $*P < 0.05$ ;  $**P < 0.01$ ;  $***P$   
**934**  $< 0.005$  versus Day 0 (1-way ANOVA with Dunnett's *post hoc* test). Results are  
**935** representative of at least two independent experiments.

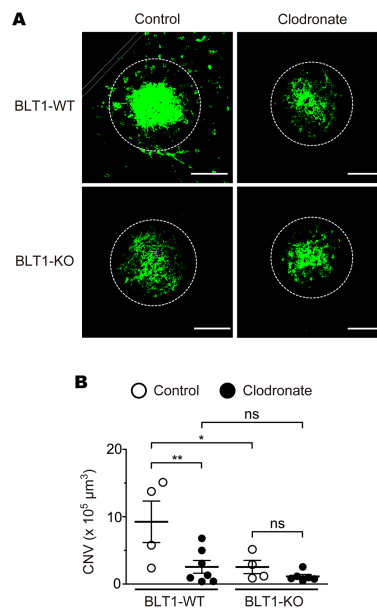

**936 Figure 4. BLT1-expressing macrophages are involved in the pathogenesis of laser-**  
**937 induced CNV.**

**938** (A, B) The effect of clodronate liposome-mediated macrophage depletion (indicated as  
**939** “Clodronate”, filled circles) on CNV volume in aged BLT1-WT and BLT1-KO mice (>  
**940** 20 weeks old). “Control” refers to control liposomes (open circles). *n*=4–7 mice per  
**941** group. Bar=100 μm. (B) \**P* < 0.05; \*\**P* < 0.01; ns, not significant (1-way ANOVA with  
**942** Newman-Keuls *post hoc* test). Results are representative of at least two independent  
**943** experiments.

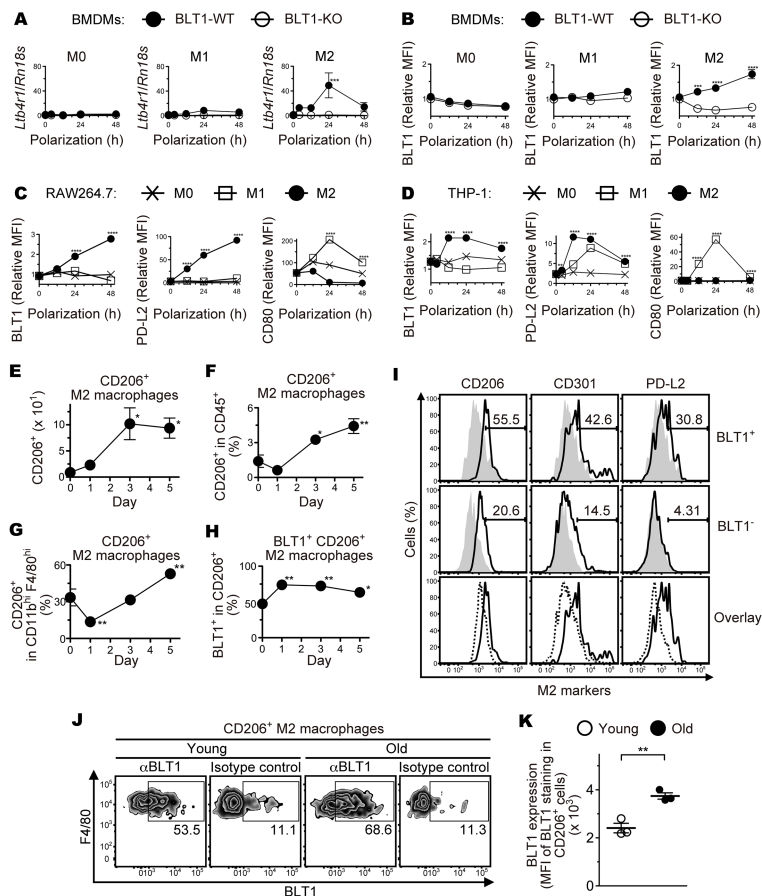

**944 Figure 5. M2-type macrophages express BLT1 and infiltrates into the injured eyes**  
**945 of aged mice.**

**946** BMDMs from aged BLT1-WT (filled circles) and BLT1-KO (open circles) mice (> 20  
**947** weeks old) were polarized to M1 and M2 macrophages, and BLT1 expression was  
**948** examined by quantitative RT-PCR (A) and FACS analysis (B). M0 denotes a sample of  
**949** non-polarized BMDMs. RAW264.7 (C) and THP-1 (D) cells were polarized to M0 (cross  
**950** plots), M1 (open squares), and M2 (filled circles) macrophages, and expression of BLT1,  
**951** PD-L2 (an M2 marker), and CD80 (an M1 marker) was examined by flow cytometry. The  
**952** Y-axis shows the MFI relative to that of an isotype control (mouse IgG<sub>1</sub>). MFI, mean  
**953** fluorescence intensity. *n*=3 per group. (E, F, G, H) FACS analysis of M2 macrophages  
**954** isolated from the laser-injured eyes of aged WT mice (> 20 weeks old) as described in  
**955** Figure 3C and D. CD206<sup>+</sup> M2 macrophages: CD11b<sup>hi</sup> F4/80<sup>hi</sup> CD206<sup>+</sup>, CD206<sup>+</sup> BLT1<sup>+</sup>  
**956** M2 macrophages: CD11b<sup>hi</sup> F4/80<sup>hi</sup> CD206<sup>+</sup> BLT1<sup>+</sup>. *n*=3–4 per group. (I) FACS analysis  
**957** of M2 markers on the ocular-infiltrating BLT1<sup>+</sup> and BLT1<sup>-</sup> macrophages on Day 5 post-  
**958** laser injury from aged WT mice. CD206, CD301, and PD-L2 are specific surface markers  
**959** of M2 macrophages. Cells were stained with anti-CD206, anti-CD301, and anti-PD-L2  
**960** mAbs (black outlines) or isotype controls (gray filled histograms). Overlays show the  
**961** expression level of M2 markers on BLT1<sup>+</sup> (black outlines) and BLT1<sup>-</sup> (black dotted lines)  
**962** macrophages. These macrophages were gated as the CD45<sup>+</sup> F4/80<sup>hi</sup> CD11b<sup>hi</sup> population.  
**963** (J, K) FACS analysis of BLT1 expression on the ocular-infiltrating CD206<sup>+</sup> M2  
**964** macrophages on Day 3 post-laser injury from young or aged WT mice. *n*=3 per group.  
**965** (A, B, C, D) \*\**P* < 0.01; \*\*\**P* < 0.005; \*\*\*\**P* < 0.001 versus 0 h (2-way ANOVA with  
**966** Bonferroni's *post hoc* test). (E, F, G, H) \**P* < 0.05; \*\**P* < 0.01 versus Day 0 (1-way

**967** ANOVA with Dunnett's *post hoc* test). (K)  $**P < 0.01$  (Student's *t* test). Results are  
**968** representative of at least two independent experiments (A-I).



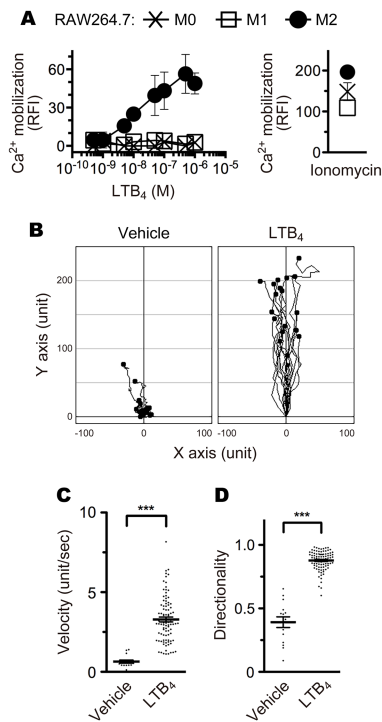

**969 Figure 6. M2 macrophages respond to LTB<sub>4</sub>.**

**970** (A) Calcium mobilization in M0- (cross plots), M1- (open squares), and M2- (filled  
**971** circles) RAW264.7 cells after stimulation with the indicated concentrations of LTB<sub>4</sub> and  
**972** 2 μM ionomycin. *n*=3 per group. (B) Chemotaxis of M2-RAW264.7 cells toward 100 nM  
**973** (highest concentration) of LTB<sub>4</sub> (*n*=18) or vehicle (*n*=15). The velocity (C) and  
**974** directionality (D) of M2-RAW264.7 cell migration in the presence of vehicle (*n*=15) or  
**975** 100 nM LTB<sub>4</sub> (*n*=93) are shown. (C, D) \*\*\**P* < 0.005 (Student's *t* test). Results are  
**976** representative of at least two independent experiments.

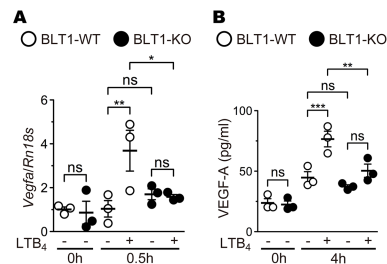

**977** **Figure 7. LTB<sub>4</sub>-BLT1 signaling induces VEGF-A production in M2 macrophages.**  
**978** BMDMs from aged BLT1-WT (open bars) and BLT1-KO (filled bars) mice (> 20 weeks  
**979** old) were polarized to M2 macrophages, and were stimulated with 500 nM LTB<sub>4</sub> or  
**980** vehicle for 0.5 h (A) or 4 h (B). The expression levels of VEGF-A mRNA (A) and protein  
**981** (B) were measured by quantitative RT-PCR and ELISA. *n*=3 per group. (A, B) \**P* < 0.05;  
**982** \*\**P* < 0.01; \*\*\**P* < 0.005; ns, not significant (1-way ANOVA with Newman-Keuls *post*  
**983** *hoc* test). Results are representative of at least two independent experiments.

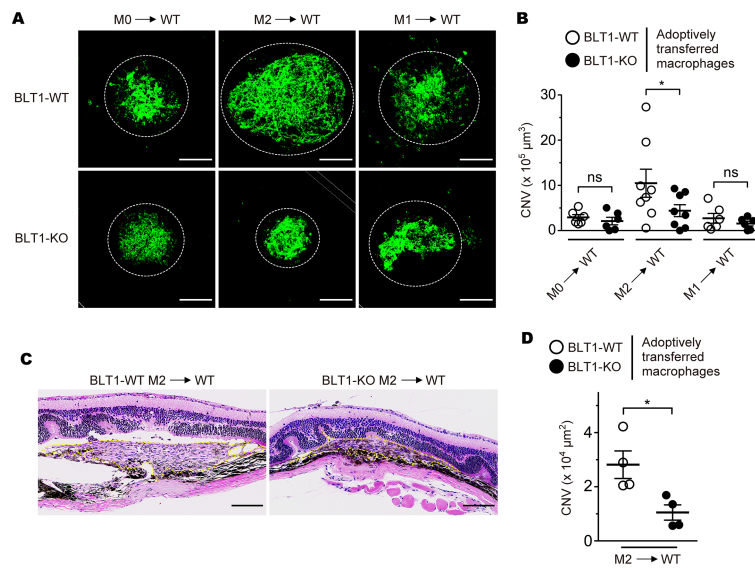

**984** **Figure 8. M2 macrophage-dependent CNV development requires BLT1.**  
**985** Images of iB4 staining (A) and CNV volume (B) in the RPE-choroid of recipient mice  
**986** that received M0-, M2-, and M1-BMDMs from aged BLT1-WT (open circles) or BLT1-  
**987** KO (filled circles) mice (> 20 weeks old). *n*=6–8 mice per group. (C, D) H&E staining  
**988** of the laser-injured retinas of recipient mice receiving M2-BMDMs from BLT1-WT or  
**989** BLT1-KO mice (> 20 weeks old). Yellow dotted lines show the lesion area. *n*=4 per group.  
**990** Bar=100 μm (A, C). (B, D) \**P* < 0.05; ns, not significant (1-way ANOVA with  
**991** Bonferroni's *post hoc* test [B] and Student's *t* test [D]). Results are representative of at  
**992** least two independent experiments.

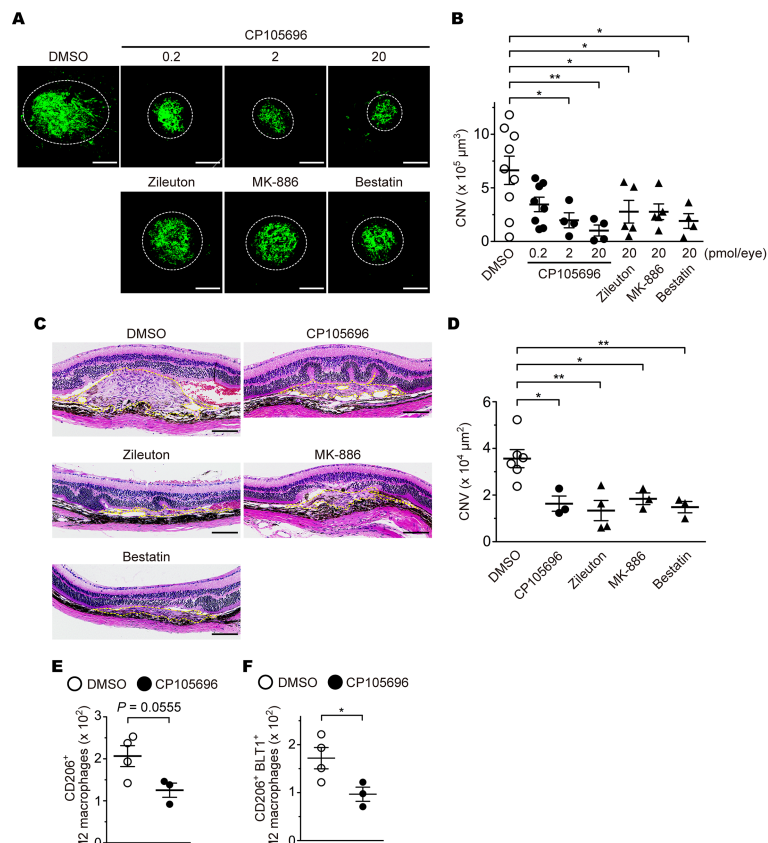

**993** **Figure 9. The effects of a BLT1 antagonist and LTB<sub>4</sub> synthesis inhibitors on**  
**994** **development of CNV.**  
**995** Images of iB<sub>4</sub> staining (A) and CNV volume (B) in the RPE-choroid from aged WT mice  
**996** (> 20 weeks old) after administration of 0.2–20 pmol of CP105696 (a BLT1 antagonist;  
**997** filled circles) or 20 pmol of Zileuton (a 5-LO inhibitor), MK-886 (a FLAP inhibitor), or  
**998** Bestatin (a LTA<sub>4</sub>H inhibitor) (filled triangles), or vehicle (open circles). *n*=4–9 mice per  
**999** group. (C, D) H&E staining of the retinas after aged WT mice (> 20 weeks old) with  
**1000** laser-induced injury were treated with CP105696, Zileuton, MK-886, and Bestatin (20  
**1001** pmol/eye), or DMSO. Yellow dotted lines show the lesion area. *n*=3–6 per group. (E, F)  
**1002** The number of the ocular-infiltrating CD206<sup>+</sup> or CD206<sup>+</sup> BLT1<sup>+</sup> M2 macrophages was  
**1003** analyzed on Day 3 post-laser injury from CP105696- (20 pmol/eye) or DMSO-injected  
**1004** WT mice (> 20 weeks old). *n*=3–4 per group. Bar=100 μm (A, C). (B, D) \**P* < 0.05; \*\**P*  
**1005** < 0.01 (1-way ANOVA with Dunnett's *post hoc* test [B, D] and Student's *t* test [E, F]).  
**1006** Results are representative of at least two independent experiments (A–D).
